# Supplementary material for: Effects of moderate and high intensity isocaloric aerobic training upon microvascular reactivity and myocardial oxidative stress in rats
Source: PLoS One. 2020 Feb 7;15(2):e0218228. doi: 10.1371/journal.pone.0218228 (PMC7006926; doi:10.1371/journal.pone.0218228)
Supplement: S1 Dataset — (XLSX) [file pone.0218228.s001.xlsx]

## Sheet: max graded test 
VO2 PEAK (ml/kg/min)							∆ VO2 PEAK				MAX RUNNING SPEED (cm/s)							∆ MAX RUNNING SPEED
MI		HI		SC			MI	HI	SC		MI		HI		SC			MI	HI	SC
Before	After	Before	After	Before	After		∆	∆	∆		Before	After	Before	After	Before	After		∆	∆	∆
85.81	89.6	87.5	95.54	75.85	76.9		3.79	8.04	1.05		72	72	64	80	72	56		0	16	-16
73.25	74.62	76.72	79.17	69.14	70.95		1.37	2.45	1.81		48	56	56	80	64	64		8	24	0
87.47	83.16	75.8	80.26	81.47	78.41		-4.31	4.46	-3.06		80	80	64	80	64	64		0	16	0
88.52	90.02	84.54	94.49	76.12	66.7		1.5	9.95	-9.42		64	72	56	72	64	56		8	16	-8
73.43	79.26	72.8	78.44	86.27	80.25		5.83	5.64	-6.02		72	80	64	80	72	72		8	16	0
73.39	79.26	72.25	75.67	75.69	71.53		5.87	3.42	-4.16		64	72	56	72	72	64		8	16	-8
70.44	72.67	88.07	92.07	77.85	73.65		2.23	4	-4.2		56	56	56	56	56	48		0	0	-8
70.96	72.49	70.36	71.85	83.77	77.6		1.53	1.49	-6.17		64	56	72	72	64	64		-8	0	0

## Sheet: isocaloric exercise bouts
Animal/group	Target VO2 PR	Target VO2 S1	Target VO2 S2	EE TOTAL PR	EE TOTAL S1	EE TOTAL S2	VO2 TOTAL PR	VO2 TOTAL S1	VO2 TOTAL S2	Duration PR	Duration S1	Duration S2
MI 1	0.011	0.0137	0.0148	5	3.95	3.45	1	0.79	0.69	60.27	60	48
MI 2	0.0125	0.0137	0.0137	5	4.05	3.3	1	0.81	0.66	77.6	60.03	49.16
MI 3	0.0119	0.0153	0.0144	5	3.65	3	1	0.73	0.6	66.8	50.16	43.1
MI 4	0.0137	0.015	0.0118	5	3.65	3.45	1	0.73	0.69	56.83	50.5	60
MI 5	0.0173	0.0153	0.0166	5	4.9	3.8	1	0.98	0.76	57.89	60.06	47.06
MI 6	0.0161	0.0159	0.016	5	4.65	3.5	1	0.93	0.7	62	60.03	45.48
MI 7	0.0151	0.0158	0.0174	5	4.5	3.8	1	0.9	0.76	61.6	58.8	45.5
MI 8	0.015	0.0117	0.0122	5	4.55	2.8	1	0.91	0.56	66.01	60.06	48.09
HI 1	0.021	0.0158	0.0182	5	2.35	4	1	0.47	0.8	53.41	32.32	45.56
HI 2	0.019	0.0199	0.0196	5	3.6	3.5	1	0.72	0.7	64.22	40.09	37.54
HI 3	0.0184	0.0176	0.0163	5	2.65	3.2	1	0.53	0.64	63.42	33.52	40.35
HI 4	0.0214	0.0193	0.0186	5	2.2	3.5	1	0.44	0.7	46.67	25.45	40
HI 5	0.0218	0.0182	0.017	5	2.65	2.85	1	0.53	0.57	46.9	30	36.28
HI 6	0.0188	0.0203	0.019	5	2.9	2.85	1	0.58	0.57	53.19	31.06	37
HI 7	0.0227	0.0214	0.0216	5	2.8	3.3	1	0.56	0.66	44.13	30.24	35.43
HI 8	0.02	0.0159	0.0172	5	2.2	2.9	1	0.44	0.58	49.22	30.2	35
PR = predicted
S1 = 1st Session
S2= 2nd Session

## Sheet: EPOC (range)
Tempo (s)	MI 1	MI 2	MI 3	MI 4	HI 1	HI 2	HI 3	HI 4			VO2 RANGE
1	15.91	12.73	12.47	11.868	21.52	15.11	17	18.29			MI1	MI2	MI3	MI4
2	15.91	12.49	12.16	11.929	21.42	14.86	16.75	18.38			6.23	4.76	4.06	1.268
3	15.91	12.49	12.47	11.929	21.42	14.86	16.8	18.29			HI1	HI2	HI3	HI4
4	15.91	12.61	12.47	12.112	21.58	14.83	16.55	18.38			10.61	6.46	8.23	9.23
5	15.91	12.73	12.47	12.174	21.32	14.83	16.64	18.52
6	15.91	12.67	12.47	11.929	21.01	14.58	16.6	18.33
7	15.91	12.55	12.47	11.868	21.22	14.63	16.6	18.33
8	15.91	12.55	12.53	11.868	21.22	14.63	16.35	18.33
9	15.91	12.42	12.53	11.818	21.06	14.7	16.4	18.33
10	15.94	12.73	12.53	12.05	21.06	14.7	16.4	18.43
11	15.76	12.73	12.53	11.818	21.37	14.63	16.23	18.33
12	15.76	12.62	12.53	11.868	20.81	14.63	16.4	18.33
13	15.76	12.67	12.47	11.818	20.81	14.38	16.4	18.33
14	15.58	12.67	12.47	11.868	20.91	14.38	16.15	18.33
15	15.62	12.62	12.47	11.929	21.02	14.5	16.2	18.43
16	15.62	12.67	12.47	11.929	21.02	14.76	16.2	18.38
17	15.62	12.67	12.47	11.929	21.02	14.68	16.2	18.57
18	15.62	12.42	12.47	12.174	21.02	14.63	16.28	18.67
19	15.62	12.42	12.53	12.112	20.81	14.63	16.03	18.57
20	15.47	12.42	12.53	11.929	20.81	14.43	15.95	18.67
21	15.47	12.42	12.53	11.868	21.02	14.43	15.95	18.67
22	15.47	12.42	12.53	11.929	20.91	14.43	15.95	18.32
23	15.47	12.42	12.58	11.879	20.81	14.5	16.2	18.42
24	15.65	12.18	12.58	11.868	20.81	14.5	16.2	18.67
25	15.65	12.18	12.33	12.174	21.02	14.5	15.92	18.57
26	15.47	12.18	12.33	12.112	21.27	14.11	15.84	18.42
27	15.47	12.24	12.33	11.818	21.06	14.04	15.75	18.42
28	15.47	12.18	12.27	12.063	21.06	14.04	15.8	18.32
29	15.47	12.18	12.33	12.174	21.27	14.43	15.8	18.42
30	15.47	12.18	12.33	12.05	21.16	14.36	15.55	18.42
31	15.47	12.18	12.27	11.929	20.7	14.29	15.55	18.32
32	15.47	12.42	12.27	11.807	20.81	14.36	15.68	18.42
33	15.51	12.42	12.27	11.818	21.02	14.43	15.68	18.32
34	15.47	12.37	12.27	11.879	21.02	14.18	15.6	18.32
35	15.47	12.37	12.27	12.124	20.86	14.18	15.27	18.31
36	15.51	12.37	12.27	12.124	20.86	14.11	15.35	18.13
37	15.33	12.37	12.27	12.001	20.82	14.29	15.35	18.13
38	15.33	12.37	12.27	12.001	20.61	14.29	15.48	18.27
39	15.33	12.32	12.27	12.001	20.61	14.04	15.15	18.02
40	15.33	12.57	12.27	12.063	20.71	14.04	15.15	18.18
41	15.33	12.57	12.27	12.124	20.97	14.16	15.15	18.02
42	15.33	12.57	12.33	12.124	20.87	14.09	15.15	18.07
43	15.33	12.57	12.27	12.063	20.41	13.77	15.15	17.73
44	15.33	12.57	12.33	12.063	20.62	14.03	15.15	17.82
45	15.15	12.57	12.33	12.001	20.41	14.03	15.22	17.82
46	15.33	12.57	12.33	12.124	20.41	14.21	15.22	17.73
47	15.33	12.57	12.08	12.124	20.66	14.35	15.2	17.82
48	15.33	12.57	12.08	12.124	20.62	14.03	15.2	17.82
49	15.33	12.52	12.08	12.063	20.67	13.96	14.95	17.78
50	15.15	12.52	12.33	12.001	20.46	14.03	14.95	17.62
51	15.15	12.77	12.27	12.063	20.46	14.03	14.95	17.62
52	15.15	12.77	12.27	12.124	20.56	14.03	15.02	17.53
53	15.15	12.77	12.27	12.001	20.47	13.83	15.02	17.62
54	15.19	12.77	12.27	12.124	20.36	13.9	15	17.34
55	15.19	12.77	12.02	12.063	20.26	13.9	14.53	17.34
56	15.19	12.77	12.02	12.063	20.26	13.83	14.6	17.42
57	15.19	12.57	12.33	12.063	20.11	13.83	14.6	17.34
58	15.19	12.57	12.33	12.124	20.16	13.83	14.53	17.42
59	15.19	12.57	12.08	12.001	20.06	13.83	14.6	17.42
60	15.19	12.32	12.33	12.063	19.96	13.83	14.67	17.14
61	15.19	12.37	12.33	12.063	20.16	13.83	14.35	17.22
62	15.19	12.37	12.27	12.124	20.16	13.9	14.35	17.14
63	15.19	12.13	12.02	12.063	19.82	13.64	14.33	17.14
64	15.01	12.18	12.02	12.124	19.82	13.58	14.33	17.22
65	15.01	12.18	12.07	12.124	19.92	13.63	14.33	16.89
66	15.19	11.93	12.07	12.124	19.87	13.63	14.2	17.03
67	15.19	11.93	12.13	12.063	19.62	13.63	14.13	17.03
68	15.19	11.93	12.13	12.063	19.67	13.63	14.2	16.94
69	15.19	11.93	12.13	12.063	19.86	13.38	14.2	16.78
70	15.19	11.93	12.13	12.124	19.52	13.63	14	16.83
71	15.01	11.93	11.93	12.124	19.37	13.63	14	16.74
72	15.04	12.18	11.93	12.124	19.66	13.56	14	16.57
73	15.04	12.18	11.93	12.063	19.66	13.38	14	17.08
74	15.04	11.93	11.93	12.124	19.37	13.63	13.93	16.74
75	15.04	11.93	11.93	12.124	19.66	13.63	13.93	16.83
76	15.04	11.93	11.93	12.124	19.66	13.56	13.93	16.83
77	15.04	12.18	11.68	12.124	19.66	13.68	13.98	16.99
78	15.04	11.93	11.68	12.124	19.66	13.38	13.74	16.78
79	15.04	11.93	11.68	12.063	19.66	13.43	13.88	16.83
80	15.04	11.93	11.63	12.124	19.32	13.43	13.81	16.74
81	15.04	12.13	11.68	12.063	19.41	13.63	13.81	16.83
82	15.04	11.88	11.68	12.124	19.51	13.7	13.81	16.83
83	15.04	12.13	11.68	12.124	19.22	13.7	13.81	16.74
84	14.86	12.13	11.74	12.063	19.32	13.7	13.81	16.74
85	14.9	12.13	11.68	11.758	19.51	13.7	13.56	16.83
86	14.9	12.13	11.68	11.879	19.56	13.63	13.49	16.74
87	14.9	12.13	11.68	11.879	19.27	13.63	13.74	16.58
88	14.9	12.32	11.68	11.879	19.46	13.63	13.74	16.58
89	14.9	12.32	11.43	11.879	19.31	13.63	13.74	16.49
90	14.9	12.32	11.43	11.879	19.21	13.63	13.81	16.49
91	15.08	12.32	11.43	11.929	19.02	13.7	13.81	16.58
92	15.08	12.32	11.48	11.929	19.26	13.7	13.56	16.49
93	14.9	12.32	11.54	11.929	19.26	13.43	13.81	16.54
94	14.9	12.32	11.48	11.929	19.17	13.43	13.81	16.38
95	14.9	12.32	11.48	11.929	18.82	13.43	13.74	16.3
96	14.9	12.32	11.48	11.868	19.06	13.43	13.74	16.3
97	14.9	12.08	11.23	11.929	19.06	13.49	13.61	16.38
98	14.9	12.08	11.29	11.929	18.87	13.29	13.61	16.3
99	14.9	12.08	11.29	11.879	18.78	13.29	13.61	16.3
100	14.9	11.83	11.54	12.124	18.72	13.23	13.54	16.38
101	14.9	11.88	11.54	11.818	18.86	13.23	13.54	16.3
102	14.94	11.88	11.59	11.879	18.77	12.98	13.54	16.3
103	14.94	11.88	11.34	11.879	18.67	13.03	13.54	16.13
104	14.76	11.88	11.59	11.758	18.43	13.09	13.61	16.1
105	14.94	11.88	11.59	11.818	18.77	13.09	13.61	16.18
106	14.76	11.88	11.59	11.868	18.43	13.09	13.59	15.98
107	14.76	11.93	11.34	12.124	18.48	13.09	13.59	15.9
108	14.76	11.93	11.34	11.868	18.57	12.98	13.59	15.98
109	14.94	11.93	11.39	11.868	18.66	12.98	13.41	16.03
110	14.94	11.93	11.34	11.868	18.23	12.98	13.66	15.7
111	14.76	11.69	11.34	11.929	18.19	13.03	13.41	15.78
112	14.76	11.69	11.34	11.929	18.46	13.09	13.41	15.7
113	14.76	11.69	11.17	11.929	18.3	13.09	13.34	15.78
114	14.76	11.69	11.34	11.929	18.03	12.84	13.34	15.78
115	14.79	11.69	11.34	11.929	18.03	12.84	13.34	15.7
116	14.79	11.93	11.34	11.683	18.03	12.84	13.34	15.58
117	14.61	11.93	11.34	11.929	18.08	12.77	13.21	15.51
118	14.61	11.88	11.34	11.683	18.08	12.77	13.21	15.58
119	14.61	11.93	11.29	11.683	17.99	13.03	13.21	15.58
120	14.43	11.88	11.34	11.683	18.03	13.03	13.21	15.51
121	14.47	11.88	11.04	11.683	18.28	13.08	13.21	15.63
122	14.47	11.93	11.23	11.624	17.94	13.08	13.14	15.56
123	14.47	11.69	11.23	11.683	18.19	13.08	13.14	15.63
124	14.47	11.69	11.23	11.733	18.28	13.08	13.14	15.63
125	14.47	11.69	11.28	11.733	18.19	13.08	13.19	15.56
126	14.47	11.69	11.23	11.733	17.94	12.83	13.01	15.63
127	14.65	11.69	11.34	11.733	18.19	12.83	13.01	15.63
128	14.65	11.69	11.17	11.733	18.28	13.14	13.01	15.31
129	14.65	11.69	11.29	11.733	17.94	12.89	13.01	15.39
130	14.47	11.64	11.29	11.733	18.19	13.14	12.95	15.31
131	14.65	11.88	11.34	11.733	18.28	13.14	12.95	15.31
132	14.47	11.88	11.23	11.733	18.03	13.14	12.95	15.39
133	14.65	11.88	11.29	11.673	17.99	13.14	12.76	15.39
134	14.65	11.88	11.29	11.488	17.99	13.14	12.76	15.44
135	14.47	11.88	11.34	11.733	18.08	13.08	12.81	15.19
136	14.47	11.88	11.42	11.733	18.08	12.83	12.75	15.19
137	14.47	11.88	11.29	11.537	17.99	13.08	12.75	15.11
138	14.47	11.88	11.54	11.537	18.08	12.83	12.5	15.19
139	14.47	11.64	11.54	11.537	18.08	12.83	12.55	15.24
140	14.47	11.64	10.61	11.537	18.04	12.83	12.61	15.16
141	14.47	11.69	11.54	11.537	18.04	12.89	12.61	14.99
142	14.29	11.44	11.34	11.292	17.88	12.89	12.55	14.99
143	14.47	11.44	11.34	11.292	17.88	12.89	12.55	14.91
144	14.51	11.49	11.29	11.537	17.79	12.89	12.36	15.04
145	14.51	11.49	11.28	11.537	17.88	12.83	12.36	15.04
146	14.33	11.25	11.59	11.292	17.88	12.83	12.36	14.96
147	14.33	11.3	11.59	11.537	17.84	12.83	12.42	15.04
148	14.33	11.3	11.59	11.537	17.59	12.89	12.42	14.79
149	14.33	11.3	11.59	11.537	17.68	12.89	12.35	14.71
150	14.33	11.3	11.53	11.537	17.68	12.89	12.11	14.79
151	14.33	11.3	11.53	11.537	17.59	12.89	12.11	14.59
152	14.33	11.1	11.59	11.537	17.59	12.88	12.11	14.52
153	14.51	11.1	11.34	11.488	17.73	12.88	12.22	14.59
154	14.51	11.1	11.28	11.537	17.64	12.88	12.22	14.59
155	14.51	11.1	11.34	11.537	17.64	12.94	12.22	14.52
156	14.51	11.1	11.59	11.537	17.73	12.99	12.22	14.84
157	14.33	11.05	11.53	11.488	17.64	12.74	12.22	14.59
158	14.33	11.3	11.48	11.537	17.64	12.74	12.22	14.57
159	14.33	11.3	11.59	11.723	17.4	12.68	12.22	14.64
160	14.33	11.25	11.28	11.733	17.48	12.42	11.96	14.64
161	14.33	11.25	11.28	11.783	17.4	12.68	11.96	14.57
162	14.33	11.49	11.28	11.783	17.4	12.42	12.02	14.64
163	14.33	11.49	11.34	11.537	17.48	12.73	12.02	14.64
164	14.15	11.49	11.34	11.783	17.48	12.48	12.08	14.57
165	14.15	11.25	11.28	11.537	17.45	12.54	12.02	14.64
166	14.33	11.25	11.28	11.537	17.28	12.54	12.02	14.57
167	14.33	11.25	11.03	11.537	17.28	12.54	12.02	14.32
168	14.33	11.49	11.03	11.537	16.95	12.28	12.02	14.39
169	14.15	11.49	11.03	11.537	16.95	12.28	12.02	14.57
170	14.33	11.25	11.03	11.537	17.09	12.54	11.71	14.39
171	14.33	11.25	11.03	11.537	17.09	12.48	12.02	14.39
172	14.33	11.25	10.92	11.537	16.75	12.48	12.07	14.32
173	14.33	11.25	11.03	11.537	16.75	12.22	11.88	14.64
174	14.33	11.25	11.03	11.537	16.84	12.22	11.82	14.44
175	14.33	11.49	11.09	11.537	16.75	12.22	11.82	14.62
176	14.33	11.25	11.03	11.537	16.51	12.22	11.76	14.44
177	14.33	11.25	11.09	11.292	16.56	12.22	11.81	14.44
178	14.33	11.49	11.14	11.537	16.64	12.28	11.62	14.37
179	14.29	11.25	11.19	11.479	16.56	12.22	11.62	14.44
180	14.33	11.49	11.14	11.537	16.31	12.34	11.68	14.44
181	14.33	11.49	11.14	11.292	16.44	12.34	11.62	14.37
182	14.15	11.49	10.83	11.292	16.44	12.34	11.62	14.69
183	14.15	11.49	10.89	11.342	16.36	12.34	11.87	14.44
184	14	11.49	10.89	11.342	16.36	12.27	11.62	14.37
185	14	11.49	10.89	11.342	16.44	12.08	11.62	14.44
186	13.82	11.49	10.83	11.342	16.49	12.02	11.62	14.44
187	13.82	11.49	10.83	11.342	16.16	12.22	11.67	14.37
188	13.86	11.49	10.83	11.342	16.16	12.27	11.73	14.44
189	13.86	11.49	10.89	11.342	16.24	12.27	11.79	14.49
190	13.86	11.49	10.89	11.342	16.24	12.27	11.48	14.42
191	14.04	11.25	10.64	11.342	16.11	12.27	11.54	14.42
192	14.04	11.54	10.69	11.342	16.36	12.02	11.48	14.49
193	14	11.54	10.69	11.342	16.49	12.08	11.73	14.42
194	14	11.3	10.69	11.342	16.24	12.08	11.48	14.42
195	14	11.49	10.64	11.342	16.19	12.08	11.48	14.49
196	14.04	11.49	10.69	11.342	16.16	12.08	11.42	14.49
197	14	11.3	10.64	11.342	16.16	12.08	11.42	14.42
198	14.04	11.54	10.64	11.342	16.41	12.27	11.42	14.49
199	14	11.54	10.64	11.342	16.41	12.02	11.42	14.49
200	14.04	11.54	10.64	11.342	16.41	12.27	11.22	14.42
201	14.04	11.3	10.69	11.342	16.49	12.02	11.22	14.42
202	14.04	11.3	10.69	11.096	16.08	12.34	11.47	14.79
203	14.04	11.3	10.69	11.096	16.41	12.08	11.17	14.54
204	14.04	11.3	10.69	11.342	16.41	12.08	11.17	14.47
205	13.86	11.3	10.69	11.096	16.24	12.34	11.17	14.54
206	13.86	11.05	10.64	11.096	16.24	12.34	11.17	14.47
207	13.86	11.05	10.64	11.342	16.16	12.27	11.17	14.47
208	13.9	11.1	10.39	11.342	16.16	12.07	11.17	14.54
209	13.9	11.1	10.13	11.096	16.24	12.07	11.28	14.54
210	13.9	11.1	10.44	11.342	16.16	12.33	11.28	14.47
211	13.9	11.1	10.44	11.342	16.16	12.13	11.17	14.29
212	13.9	11.1	10.74	11.342	15.96	12.08	11.33	14.29
213	13.9	10.85	10.74	11.096	16.04	12.07	11.03	14.47
214	13.72	11.1	10.74	11.096	16.04	12.07	11.28	14.54
215	13.9	10.85	10.47	11.342	15.96	12.07	11.28	14.54
216	13.9	11.1	10.69	11.284	15.96	12.07	11.03	14.47
217	14.09	11.05	10.69	11.096	16.04	11.82	10.97	14.47
218	14.09	11.3	10.69	11.342	15.77	11.88	11.03	14.54
219	14.09	11.25	10.69	11.146	15.77	11.88	11.28	14.47
220	14.09	11.49	10.74	11.391	15.52	11.88	11.28	14.54
221	14.09	11.49	10.74	11.391	15.65	11.88	11.39	14.54
222	14.09	11.49	10.74	11.391	15.65	11.82	11.39	14.47
223	14.09	11.54	10.74	11.032	15.32	11.82	11.39	14.47
224	13.94	11.3	10.44	11.146	15.37	11.82	11.14	14.54
225	13.94	11.3	10.69	11.089	15.2	11.93	11.39	14.47
226	14.13	11.3	10.69	11.032	15.2	11.93	11.33	14.47
227	14.13	11.3	10.74	11.089	15.05	11.93	11.39	14.54
228	13.94	11.35	10.63	11.146	15.12	11.88	11.34	14.22
229	13.94	11.1	10.74	10.789	15.2	11.82	11.39	14.22
230	13.94	11.1	10.74	11.089	15.12	11.82	11.03	14.29
231	13.94	11.1	10.69	11.032	15.12	11.82	11.28	14.22
232	13.98	11.1	10.69	11.089	15.12	11.82	11.14	14.47
233	13.8	11.1	10.69	11.032	15.2	11.82	11.33	14.29
234	13.8	11.1	9.61	11.089	15.05	11.88	11.33	14.29
235	13.8	11.1	10.49	11.032	15.37	11.88	11.22	14.22
236	13.8	11.1	10.49	11.089	15.45	12.13	11.22	14.34
237	13.8	11.1	10.49	11.032	15.29	11.88	11.22	14.34
238	13.8	11.1	10.49	11.089	15.37	11.87	11.22	14.27
239	13.8	11.1	10.49	11.146	15.45	11.87	11.34	14.27
240	13.8	11.1	10.54	10.845	15.45	11.87	11.34	14.34
241	13.8	11.1	10.54	10.845	15.37	11.62	11.34	14.34
242	13.8	11.35	10.54	10.789	15.37	11.67	11.34	14.27
243	13.8	11.1	10.54	10.845	15.45	11.73	11.34	14.34
244	13.83	11.1	10.33	10.845	15.45	11.67	11.59	14.59
245	13.83	11.35	10.38	10.839	15.37	11.73	11.54	14.52
246	13.93	11.3	10.49	10.95	15.37	11.48	11.62	14.52
247	13.75	11.3	10.54	10.95	15.45	11.68	11.93	14.34
248	13.84	11.3	10.54	10.894	15.45	11.43	11.87	14.59
249	13.75	11.3	10.29	10.839	15.37	11.62	11.94	14.27
250	13.65	11.59	10.24	10.894	15.62	11.48	11.94	14.27
251	13.47	11.59	10.49	10.894	15.37	11.73	11.94	14.59
252	13.47	11.35	10.24	10.839	15.7	11.67	12.13	14.27
253	13.47	11.35	10.29	10.894	15.45	11.67	11.94	14.27
254	13.47	11.35	10.29	10.839	15.62	11.42	11.94	14.34
255	13.51	11.35	10.29	10.645	15.24	11.42	11.88	14.34
256	13.51	11.35	10.29	10.7	15.62	11.42	11.96	14.27
257	13.69	11.1	10.29	10.944	15.62	11.42	12.02	14.34
258	13.51	11.35	10.29	10.888	15.62	11.48	12.02	14.27
259	13.51	11.35	10.34	10.944	15.62	11.48	12.08	14.27
260	13.51	11.35	10.09	10.944	15.4	11.48	12.02	14.59
261	13.51	11.1	10.14	10.7	15.29	11.48	12.08	14.34
262	13.51	11.35	10.29	10.7	15.29	11.48	12.02	14.27
263	13.51	11.35	10.29	10.944	15.32	11.42	12.02	14.34
264	13.51	11.1	10.29	11	15.65	11.42	12.02	14.4
265	13.51	11.15	10.34	11	15.24	11.42	12.08	14.32
266	13.51	11.15	10.34	10.944	15.16	11.42	12.02	14.4
267	13.51	11.15	10.34	10.645	15.24	11.48	11.89	14.32
268	13.51	11.15	9.88	10.944	15.57	11.68	11.77	14.32
269	13.51	11.15	10.29	10.944	15.37	11.73	11.71	14.32
270	13.51	11.15	10.04	10.645	15.62	11.68	11.89	14.32
271	13.32	10.9	10.39	10.7	15.29	11.68	11.83	14.15
272	13.32	11.15	10.39	10.645	15.62	11.62	11.88	14.07
273	13.32	11.15	10.39	10.645	15.54	11.62	11.88	14.15
274	13.36	11.15	9.98	10.645	15.7	11.73	11.76	14.07
275	13.18	11.15	10.34	10.645	15.37	11.73	11.82	14.13
276	13.18	11.1	10.29	10.645	15.24	11.73	11.94	14.13
277	13.18	11.1	10.29	10.645	15.54	11.73	11.82	14.13
278	13.18	11.35	10.29	10.645	15.32	11.67	11.69	14.13
279	13.18	11.35	10.34	10.645	15.65	11.67	11.88	14.13
280	13.18	11.35	10.54	10.645	15.65	11.67	11.57	14.2
281	13.18	11.3	10.59	10.7	15.57	11.73	11.69	14.13
282	13.18	11.54	10.54	10.65	15.49	11.73	11.69	14.13
283	13.18	11.54	10.38	10.596	15.4	11.67	11.82	14.13
284	13.18	11.54	10.43	10.596	15.65	11.67	11.88	14.13
285	13.18	11.54	10.54	10.705	15.57	11.67	11.87	14.2
286	13.22	11.54	10.64	10.705	15.57	11.67	11.87	14.13
287	13.22	11.3	10.64	10.65	15.65	11.67	11.87	13.95
288	13.22	11.3	10.34	10.894	15.37	11.73	11.99	13.88
289	13.22	11.35	10.34	10.95	15.29	11.73	11.62	13.88
290	13.22	11.35	10.34	10.894	15.7	11.73	11.62	13.95
291	13.22	11.35	10.34	10.894	15.45	11.42	11.62	13.88
292	13.22	11.35	10.64	10.65	15.37	11.42	11.62	14.13
293	13.03	11.35	10.39	10.95	15.37	11.42	11.56	14.25
294	13.03	11.35	10.39	10.95	15.45	11.47	11.56	13.93
295	13.03	11.35	10.34	10.894	15.29	11.53	11.68	13.93
296	13.03	11.15	10.34	10.894	15.37	11.53	11.87	14
297	13.03	11.15	10.34	10.894	15.12	11.48	11.62	13.93
298	13.03	11.15	10.39	10.95	15.25	11.53	11.62	13.93
299	13.03	11.2	10.39	10.894	15.42	11.53	11.62	13.75
300	13.07	10.95	10.45	10.894	15.1	11.53	11.62	13.68
301	13.07	10.95	10.14	10.95	15.25	11.47	11.62	13.68
302	13.07	10.95	10.39	10.65	15.17	11.47	11.31	13.68
303	13.07	11	10.39	10.65	15.17	11.47	11.31	13.61
304	13.07	10.95	10.45	10.705	15.17	11.47	11.42	13.66
305	13.07	10.95	10.2	10.95	15.25	11.47	11.42	13.8
306	12.89	11.2	10.2	10.901	15.25	11.47	11.48	13.41
307	13.07	11.15	10.14	10.845	15.22	11.47	11.42	13.35
308	12.89	11.15	10.39	10.901	15.22	11.53	11.54	13.55
309	13.07	11.15	10.39	10.95	15.3	11.28	11.54	13.48
310	12.89	11.15	10.39	10.894	15.22	11.53	11.54	13.48
311	12.89	11.15	10.45	10.95	14.9	11.28	11.54	13.55
312	12.89	11.15	10.2	10.95	14.98	11.28	11.48	13.48
313	12.89	11.2	10.14	10.95	15.05	11.53	11.48	13.41
314	12.89	11.2	9.63	10.705	14.98	11.28	11.43	13.48
315	12.89	11.2	10.39	10.95	14.98	11.22	11.49	13.48
316	12.89	10.95	10.39	10.95	14.9	11.53	11.62	13.53
317	12.89	10.95	10.39	10.95	15.05	11.47	11.62	13.6
318	12.89	10.95	10.2	10.95	15.05	11.47	11.62	13.46
319	12.92	10.95	10.2	10.95	14.98	11.47	11.62	13.6
320	12.92	11	10.14	10.95	14.95	11.47	11.62	13.6
321	12.74	10.95	10.14	10.95	14.78	11.47	11.56	13.53
322	12.74	11	10.14	10.95	14.85	11.47	11.56	13.53
323	12.74	11	10.14	10.95	14.85	11.42	11.56	13.53
324	12.6	11	9.95	10.95	14.78	11.53	11.74	13.53
325	12.6	11	10.09	10.95	14.78	11.48	11.74	13.53
326	12.6	11	10.2	10.95	14.85	11.53	11.74	13.6
327	12.6	11	10.2	10.894	14.78	11.53	11.8	13.53
328	12.6	11	10.25	10.894	14.7	11.22	11.74	13.53
329	12.6	11	10.25	10.95	14.95	11.22	11.49	13.6
330	12.6	11.05	9.95	10.95	15.03	11.22	11.74	13.53
331	12.6	10.81	10	10.95	14.78	11.22	11.37	13.28
332	12.6	11.05	10.2	10.95	14.75	11.28	11.62	13.35
333	12.6	11.05	10.2	10.95	14.83	11.28	11.74	13.28
334	12.6	11	10.2	10.596	14.83	11.33	11.74	13.28
335	12.6	11	10.09	10.541	14.58	11.27	11.54	13.35
336	12.6	11	10.09	10.541	14.56	11.27	11.68	13.33
337	12.63	11	9.9	10.596	14.63	11.22	11.68	13.33
338	12.63	11.25	9.95	10.596	14.63	11.27	11.62	13.33
339	12.63	11.25	10	10.705	14.63	11.28	11.51	13.4
340	12.63	11	10	10.705	14.56	11.28	11.62	13.09
341	12.45	11	9.9	10.705	14.56	11.28	11.62	13.09
342	12.45	11.25	9.95	10.705	14.46	11.27	11.37	13.15
343	12.45	11	10	10.705	14.51	11.22	11.37	13.09
344	12.45	11	9.65	10.705	14.43	11.27	11.37	13.09
345	12.45	10.81	10	10.705	14.43	11.33	11.37	13.15
346	12.45	10.81	10.05	10.705	14.51	11.33	11.37	13.09
347	12.45	10.81	9.8	10.705	14.43	11.33	11.49	12.89
348	12.63	10.81	9.95	10.705	14.43	11.27	11.49	12.95
349	12.45	10.81	9.75	10.705	14.51	11.27	11.29	12.95
350	12.63	10.81	9.8	10.705	14.51	11.27	11.23	13.14
351	12.63	10.81	9.8	10.705	14.43	11.27	11.29	13.14
352	12.45	10.61	9.8	10.705	14.43	11.27	11.29	13.2
353	12.45	10.61	10.05	10.705	14.51	11.33	11.29	13.14
354	12.45	10.61	9.75	10.705	14.51	11.33	11.34	12.89
355	12.45	10.61	10	10.705	14.68	11.33	11.29	12.95
356	12.45	10.61	10.05	10.705	14.68	11.33	11.29	13.14
357	12.45	10.61	10.05	10.705	14.76	11.33	11.29	12.89
358	12.45	10.61	9.85	10.705	14.51	11.02	11.22	12.95
359	12.45	10.61	9.85	10.95	14.43	11.02	10.97	12.94
360	12.27	10.37	9.8	10.95	14.43	11.22	11.08	12.94
361	12.27	10.61	9.8	10.95	14.51	11.27	11.08	13
362	12.45	10.61	9.8	10.705	14.51	11.27	11.08	12.94
363	12.27	10.61	9.8	10.705	14.43	11.27	11.08	12.94
364	12.31	10.61	9.85	10.705	14.43	11.33	11.08	13
365	12.31	10.61	9.8	10.705	14.56	11.33	11.28	12.94
366	12.31	10.61	9.8	10.705	14.56	11.33	11.28	12.94
367	12.31	10.61	10.05	10.705	14.48	11.33	11.34	12.76
368	12.31	10.56	10.1	10.705	14.48	11.33	11.34	12.94
369	12.31	10.56	9.85	10.705	14.24	11.27	11.14	12.94
370	12.31	10.56	9.8	10.459	14.31	11.27	11.14	13
371	12.12	10.56	9.8	10.705	14.24	11.27	11.08	12.94
372	12.12	10.56	10	10.705	14.09	11.27	11.08	12.94
373	11.96	10.56	10.05	10.755	14.48	11.27	11.08	12.76
374	12.04	10.56	9.85	10.456	14.31	11.27	11.08	12.74
375	12.12	10.56	9.85	10.509	14.31	11.27	11.08	12.81
376	12.31	10.56	9.8	10.705	14.24	11.27	11.08	12.81
377	12.04	10.81	10.05	10.705	14.24	11.27	11.03	12.74
378	12.14	10.81	10.1	10.459	14.31	11.02	11.14	12.56
379	12.31	10.86	10.1	10.459	14.36	10.96	11.14	12.56
380	12.31	10.86	10.05	10.705	14.29	11.07	11.14	12.49
381	12.14	10.81	10.05	10.459	14.29	11.07	10.88	12.61
382	12.14	10.86	9.8	10.459	14.36	11.02	10.88	12.54
383	12.14	10.86	9.85	10.705	14.36	10.96	10.94	12.54
384	12.14	10.86	9.85	10.459	14.29	10.96	10.88	12.36
385	11.96	10.61	9.8	10.402	14.29	11.21	10.94	12.48
386	11.99	10.86	9.8	10.509	14.36	11.21	10.94	12.48
387	11.99	10.86	9.8	10.509	14.36	11.15	10.94	12.61
388	12.08	10.86	9.85	10.509	14.29	11.21	10.94	12.48
389	11.99	10.81	9.8	10.509	14.29	11.21	10.88	12.23
390	11.99	10.81	9.8	10.509	14.36	11.21	10.83	12.54
391	11.99	10.56	9.8	10.509	14.36	10.96	10.88	12.3
392	11.99	10.86	9.85	10.456	14.29	11.02	10.94	12.48
393	12.08	10.61	9.85	10.509	14.29	10.96	10.94	12.54
394	11.99	10.61	9.8	10.509	14.36	11.21	10.94	12.48
395	11.99	10.61	9.85	10.509	14.04	10.96	10.99	12.48
396	11.81	10.86	9.6	10.509	13.97	11.02	11.24	12.48
397	11.85	10.61	9.51	10.509	14.04	11.02	11.24	12.48
398	11.85	10.61	9.6	10.509	14.11	10.96	10.94	12.23
399	11.85	10.61	9.65	10.509	14.16	11.02	10.94	12.3
400	11.85	10.37	9.6	10.509	14.09	10.76	11.13	12.3
401	11.85	10.37	9.6	10.264	13.84	10.96	11.13	12.17
402	11.85	10.37	9.9	10.509	13.91	10.66	10.83	12.23
403	12.01	10.17	9.65	10.264	13.91	10.91	10.94	12.3
404	12.01	10.17	9.65	10.456	13.84	10.66	10.94	12.22
405	12.01	10.17	9.6	10.509	13.84	10.71	10.94	12.22
406	12.01	10.17	9.6	10.509	13.91	11.02	11.13	12.28
407	12.01	9.92	9.6	10.509	13.84	10.76	11.19	12.22
408	12.01	10.17	9.6	10.509	13.84	10.71	11.24	12.22
409	12.01	10.17	9.65	10.509	13.84	10.85	10.99	12.22
410	12.01	10.17	9.9	10.509	13.91	10.91	11.19	12.22
411	12.01	10.17	9.85	10.509	13.91	10.96	11.19	12.22
412	12.01	10.17	9.85	10.509	13.59	10.71	11.19	12.22
413	12.01	10.17	9.85	10.509	13.59	10.76	11.13	12.22
414	12.01	10.17	9.65	10.509	13.59	10.76	11.19	12.22
415	11.83	10.12	9.9	10.755	13.59	10.71	11.19	12.47
416	11.83	10.12	9.85	10.509	13.59	10.96	11.24	12.22
417	12.01	10.12	9.85	10.755	13.91	10.66	10.94	12.22
418	11.83	10.17	9.8	10.755	13.84	10.66	11.24	12.28
419	11.87	10.17	9.55	10.559	13.59	10.71	11.24	12.47
420	11.87	10.17	9.6	10.509	13.84	10.76	11.24	12.47
421	11.87	9.92	9.85	10.755	13.66	10.76	10.99	12.47
422	11.87	9.92	9.85	10.804	13.84	10.76	11.24	12.22
423	11.87	9.92	9.8	10.804	13.84	10.76	10.99	12.35
424	11.87	9.92	9.55	10.509	13.91	10.76	10.99	12.22
425	11.87	10.17	9.8	10.804	13.84	10.51	10.99	12.28
426	11.87	10.17	9.8	10.451	13.59	10.46	10.99	12.35
427	11.87	10.17	9.85	10.559	13.66	10.46	10.99	12.22
428	11.91	10.12	9.65	10.559	13.64	10.76	11.04	12.35
429	11.91	10.17	9.6	10.559	13.89	10.76	10.79	12.35
430	11.91	10.17	9.6	10.559	13.71	10.51	10.74	12.35
431	11.91	10.17	9.6	10.559	13.71	10.76	10.74	12.35
432	11.91	10.17	9.6	10.505	13.64	10.76	10.99	12.41
433	11.91	10.17	9.65	10.559	13.64	10.76	10.74	12.28
434	11.91	10.17	9.65	10.559	13.71	10.76	10.74	12.35
435	11.91	10.17	9.65	10.559	13.46	10.76	10.68	12.1
436	11.91	10.17	9.65	10.559	13.39	10.71	10.63	12.1
437	11.91	10.17	9.35	10.559	13.39	10.71	10.74	12.04
438	11.72	10.17	9.65	10.749	13.46	10.76	10.74	12.16
439	11.72	9.92	9.65	10.559	13.39	10.76	10.84	12.15
440	11.72	10.17	9.6	10.559	13.64	10.76	10.84	12.15
441	11.72	10.17	9.6	10.559	13.39	10.76	10.79	12.4
442	11.72	10.17	9.6	10.559	13.76	10.76	10.79	12.21
443	11.72	10.17	9.65	10.559	13.45	10.76	10.74	12.15
444	11.76	10.12	9.65	10.559	13.69	10.76	10.74	12.15
445	11.76	10.17	9.65	10.559	13.51	10.76	10.79	12.21
446	11.76	10.12	9.65	10.559	13.69	10.76	10.48	12.09
447	11.76	10.37	9.6	10.559	13.45	10.82	10.53	12.15
448	11.76	10.37	9.6	10.559	13.69	10.82	10.53	12.15
449	11.58	10.37	9.6	10.559	13.76	10.76	10.79	12.09
450	11.58	10.37	9.6	10.559	13.69	10.87	10.79	11.84
451	11.76	10.37	9.65	10.559	13.62	10.87	10.53	12.15
452	11.76	10.37	9.65	10.313	13.76	10.62	10.59	12.15
453	11.58	10.37	9.65	10.313	13.45	10.62	10.64	12.15
454	11.76	10.37	9.65	10.313	13.69	10.62	10.59	12.2
455	11.76	10.37	9.6	10.313	13.69	10.56	10.59	12.26
456	11.58	10.37	9.65	10.313	13.76	10.92	10.33	12.2
457	11.58	10.37	9.65	10.363	13.69	10.62	10.28	12.14
458	11.58	10.22	9.7	10.363	13.45	10.62	10.23	12.2
459	11.58	10.37	9.7	10.363	13.51	10.56	10.33	11.89
460	11.58	10.42	9.65	10.363	13.69	10.56	10.33	12.14
461	11.58	10.52	9.6	10.363	13.45	10.56	10.39	12.2
462	11.58	10.37	9.6	10.363	13.51	10.61	10.33	12.26
463	11.61	10.37	9.6	10.363	13.45	10.56	10.33	12.14
464	11.61	10.37	9.65	10.118	13.45	10.56	10.33	12.2
465	11.61	10.17	9.65	10.118	13.45	10.76	10.33	12.14
466	11.61	10.17	9.65	10.118	13.26	10.81	10.03	12.2
467	11.43	10.17	9.6	10.118	13.2	10.81	10.33	12.15
468	11.43	10.17	9.6	10.363	13.5	10.76	10.33	12.21
469	11.61	10.17	9.6	10.363	13.56	10.76	10.33	12.2
470	11.43	10.17	9.6	10.118	13.25	10.56	10.33	12.2
471	11.61	9.92	9.6	10.118	13.5	10.56	10.33	12.26
472	11.61	9.92	9.65	10.118	13.56	10.81	10.33	12.14
473	11.43	9.92	9.65	10.118	13.56	10.51	10.33	11.89
474	11.43	9.97	9.65	10.118	13.25	10.56	10.33	11.95
475	11.43	9.97	9.65	10.118	13.31	10.62	10.33	11.95
476	11.43	9.92	9.6	10.118	13.31	10.61	10.33	12.14
477	11.43	9.92	9.6	10.118	13.25	10.67	10.39	12.2
478	11.43	10.22	9.6	10.118	13.25	10.61	10.39	11.95
479	11.43	10.22	9.6	10.118	13.56	10.61	10.18	12.14
480	11.43	9.97	9.6	10.116	13.25	10.61	10.39	11.95
481	11.43	9.97	9.65	10.116	13.56	10.61	10.44	11.83
482	11.43	9.97	9.65	10.168	13.56	10.56	10.39	11.83
483	11.43	9.97	9.6	10.168	13.5	10.56	10.28	11.89
484	11.43	9.97	9.6	10.064	13.5	10.51	10.03	11.89
485	11.43	9.97	9.6	10.168	13.31	10.72	10.03	11.83
486	11.61	9.97	9.6	9.922	13.25	10.61	10.03	11.83
487	11.43	9.97	9.6	9.922	13.5	10.67	10.28	11.88
488	11.47	9.97	9.65	10.168	13.5	10.61	10.08	11.63
489	11.47	9.97	9.9	10.168	13.43	10.61	10.33	11.94
490	11.47	9.92	9.85	10.168	13.5	10.42	10.33	11.88
491	11.47	9.92	9.85	10.168	13.31	10.67	10.33	11.88
492	11.29	9.92	9.85	10.168	13.11	10.72	10.39	11.69
493	11.29	10.17	9.6	9.922	13.5	10.56	9.98	11.94
494	11.29	10.17	9.65	9.922	13.56	10.36	10.03	11.63
495	11.29	10.17	9.65	10.168	13.55	10.42	10.08	12
496	11.29	9.92	9.65	10.168	13.55	10.36	10.13	11.75
497	11.29	9.92	9.6	10.168	13.62	10.31	10.18	11.63
498	11.29	10.17	9.6	10.168	13.55	10.56	10.08	11.69
499	11.29	9.97	9.65	10.168	13.23	10.61	10.44	11.75
500	11.29	9.97	9.65	10.168	13.55	10.56	10.33	11.69
501	11.29	9.97	9.7	10.168	13.62	10.61	10.28	11.75
502	11.29	9.97	9.45	10.168	13.41	10.36	10.13	11.63
503	11.29	9.97	9.4	10.168	13.23	10.36	10.19	11.45
504	11.29	9.97	9.4	10.116	13.37	10.56	10.49	11.44
505	11.29	9.92	9.4	10.168	13.3	10.56	10.44	11.74
506	11.29	9.97	9.65	10.168	13.23	10.36	10.19	11.45
507	11.29	9.97	9.7	10.168	13.3	10.66	10.13	11.74
508	11.29	9.97	9.7	10.116	13.3	10.42	10.03	11.56
509	11.29	9.97	9.45	10.168	13.23	10.42	10.03	11.61
510	11.29	9.97	9.4	10.064	13.23	10.61	10.03	11.8
511	11.25	9.97	9.65	9.77	13.3	10.36	10.39	11.56
512	11.25	9.97	9.65	9.922	13.03	10.66	10.39	11.61
513	11.25	9.92	9.65	10.118	13.03	10.66	10.39	11.61
514	11.29	9.92	9.7	10.168	13.1	10.72	10.39	11.5
515	11.29	10.17	9.7	10.168	13.09	10.42	10.39	11.56
516	11.47	10.17	9.7	10.168	12.9	10.42	10.23	11.61
517	11.47	10.17	9.65	10.168	12.97	10.66	10.28	11.8
518	11.47	10.17	9.65	10.118	12.84	10.61	10.23	11.8
519	11.29	10.17	9.7	10.118	12.77	10.61	10.28	11.61
520	11.29	9.97	9.7	10.118	12.97	10.66	10.33	11.56
521	11.29	9.97	9.7	10.014	12.66	10.61	10.39	11.56
522	11.29	9.97	9.5	10.168	12.59	10.31	10.64	11.61
523	11.29	9.97	9.5	10.168	12.77	10.31	10.33	11.61
524	11.29	10.17	9.7	10.118	12.64	10.56	10.59	11.56
525	11.29	9.92	9.7	10.168	12.95	10.56	10.43	11.36
526	11.1	10.17	9.65	10.168	12.95	10.36	10.43	11.42
527	11.1	10.27	9.65	10.168	12.71	10.36	10.48	11.36
528	11.29	10.27	9.65	9.922	12.71	10.42	10.43	11.36
529	11.29	10.33	9.65	10.118	12.64	10.42	10.53	11.42
530	11.1	10.33	9.65	10.066	12.71	10.42	10.53	11.36
531	11.29	10.27	9.7	10.116	12.71	10.42	10.53	11.36
532	11.29	10.27	9.75	10.168	12.71	10.42	10.53	11.42
533	11.29	10.08	9.75	10.116	12.77	10.42	10.79	11.3
534	11.29	10.27	9.5	10.116	12.71	10.42	10.79	11.36
535	11.29	10.03	9.46	10.168	12.64	10.42	10.79	11.42
536	11.29	10.08	9.5	10.118	12.77	10.42	10.68	11.42
537	11.1	10.13	9.46	10.168	12.33	10.42	10.68	11.36
538	11.1	10.08	9.46	10.168	12.46	10.42	10.63	11.42
539	11.1	10.08	9.46	10.118	12.71	10.36	10.68	11.31
540	11.29	10.13	9.46	10.363	12.71	10.36	10.73	11.31
541	11.29	9.83	9.5	10.413	12.52	10.36	10.53	11.36
542	11.29	10.08	9.31	10.118	12.39	10.42	10.48	11.42
543	11.29	9.88	9.31	10.118	12.51	10.42	10.48	11.42
544	11.29	9.83	9.51	10.31	12.57	10.42	10.68	11.36
545	11.29	9.88	9.26	10.413	12.39	10.42	10.73	11.61
546	11.1	9.88	9.51	10.363	12.76	10.42	10.73	11.67
547	11.29	9.93	9.26	10.168	12.76	10.42	10.73	11.61
548	11.29	9.93	9.56	10.363	12.69	10.42	10.68	11.61
549	11.29	9.88	9.56	10.168	12.71	10.42	10.73	11.36
550	11.29	9.88	9.51	10.413	12.71	10.36	10.48	11.67
551	11.29	9.93	9.26	10.413	12.71	10.36	10.48	11.61
552	11.32	9.68	9.46	10.116	12.71	10.36	10.48	11.61
553	11.32	9.63	9.46	10.168	12.64	10.42	10.38	11.67
554	11.32	9.88	9.75	10.363	12.64	10.42	10.43	11.61
555	11.32	9.93	9.7	10.363	12.71	10.42	10.43	11.61
556	11.14	9.88	9.95	10.363	12.58	10.42	10.53	11.61
557	11.32	9.88	9.9	10.363	12.64	10.42	10.53	11.31
558	11.14	9.88	9.85	10.363	12.77	10.42	10.73	11.42
559	11.14	9.93	10.1	10.363	12.39	10.17	10.79	11.42
560	11.14	9.93	10.1	10.363	14.41	10.11	10.79	11.36
561	11.14	9.88	10.15	10.609	14.53	10.11	10.73	11.61
562	11.14	9.88	10.05	10.363	14.47	10.17	10.79	11.42
563	11.14	9.93	10.1	10.31	14.47	10.17	10.68	11.67
564	11.14	9.88	10.05	10.363	14.47	10.17	10.68	11.36
565	11.14	9.88	10.05	10.363	14.53	10.17	10.43	11.36
566	11.14	9.88	10.05	10.363	14.47	9.92	10.68	11.42
567	11.14	9.88	10.05	10.363	14.47	10.11	10.79	11.42
568	11.14	9.93	10.05	10.168	14.53	10.17	10.79	11.36
569	11.14	9.88	10.35	10.168	14.7	10.17	10.84	11.42
570	11.14	9.83	10.35	10.168	14.47	10.17	10.79	11.17
571	11.14	9.88	10.15	9.922	14.53	9.97	10.53	11.11
572	11.14	9.83	10.4	9.922	14.47	10.22	10.53	11.11
573	11.14	9.83	10.1	9.972	14.41	10.22	10.53	11.42
574	11.14	10.08	10.1	9.972	14.47	9.97	10.53	11.36
575	11.14	10.13	10.1	9.972	14.41	10.22	10.43	11.36
576	11.14	10.08	10.1	9.972	14.41	10.17	10.43	11.42
577	11.32	9.83	9.85	9.627	14.47	10.22	10.53	11.42
578	11.32	9.88	9.85	9.726	14.41	10.27	10.53	11.36
579	11.14	9.88	9.85	9.726	14.12	10.22	10.53	11.42
580	11.14	9.83	9.9	9.726	14.24	10.17	10.53	11.36
581	11.14	9.88	9.9	9.776	14.12	10.17	10.53	11.36
582	11.14	9.88	9.95	9.776	14.06	10.17	10.68	11.42
583	11.32	9.88	9.95	9.776	14.24	10.22	10.68	11.36
584	11.32	9.88	9.7	9.776	13.77	10.17	10.63	11.36
585	11.14	9.93	9.95	9.776	13.89	10.11	10.68	11.17
586	11.14	9.68	9.56	9.726	13.95	10.17	10.68	11.36
587	11.14	9.68	9.07	9.776	13.83	10.11	10.73	11.36
588	11.32	9.73	9.95	9.726	13.89	10.11	10.68	11.42
589	11.32	9.68	9.65	9.972	13.95	10.22	10.68	11.36
590	11.32	9.43	9.65	9.972	13.55	10.22	10.68	11.11
591	11.14	9.48	9.9	9.776	13.61	10.22	10.38	11.42
592	11.14	9.43	9.65	9.972	13.95	10.17	10.63	11.36
593	11.14	9.43	9.95	9.972	13.66	10.22	10.38	11.42
594	11.32	9.48	9.7	9.972	13.66	10.27	10.38	11.42
595	11.32	9.43	9.7	9.972	13.72	10.22	10.63	11.36
596	11.32	9.43	9.7	9.972	13.6	10.22	10.48	11.36
597	11.32	9.53	9.7	10.168	13.66	10.17	10.48	11.42
598	11.32	9.43	9.7	10.168	13.72	10.22	10.48	11.36
599	11.32	9.43	9.7	10.168	13.6	10.22	10.73	11.36
600	11.32	9.43	9.75	10.413	13.6	10.22	10.73	11.42
601	11.32	9.73	9.75	10.363	13.72	10.22	10.68	11.42
602	11.32	9.68	9.5	10.363	13.6	10.22	10.68	11.36
603	11.32	9.68	9.5	10.413	13.66	10.22	10.68	11.42
604	11.32	9.73	9.7	10.413	13.72	10.22	10.38	11.42
605	11.32	9.68	9.46	10.413	13.6	10.17	10.73	11.36
606	11.14	9.43	9.7	10.413	13.38	10.11	10.43	11.36
607	11.14	9.43	9.7	10.168	13.66	10.17	10.73	11.42
608	11.14	9.48	9.75	10.413	13.6	10.17	10.48	11.42
609	11.18	9.43	9.5	10.413	13.54	10.32	10.48	11.36
610	11.18	9.43	9.5	10.168	13.72	10.32	10.73	11.42
611	11.18	9.43	9.7	10.168	13.6	10.22	10.68	11.36
612	11	9.48	9.7	10.413	13.6	10.27	10.68	11.36
613	11	9.68	9.7	10.168	13.72	10.52	10.43	11.42
614	11	9.68	9.46	10.168	13.6	10.27	10.68	11.42
615	11	9.43	9.46	10.219	13.26	10.27	10.68	11.36
616	11	9.73	9.5	10.168	13.44	10.27	10.68	11.42
617	11	9.43	9.5	10.168	13.44	10.22	10.68	11.17
618	11	9.68	9.75	10.413	13.26	10.27	10.68	11.36
619	11	9.43	9.7	10.363	13.38	10.22	10.68	11.36
620	11	9.48	9.46	10.413	13.38	10.22	10.48	11.36
621	11	9.43	9.46	10.413	13.2	10.22	10.43	11.36
622	11	9.68	9.46	10.413	13.32	10.27	10.68	11.36
623	11	9.68	9.46	10.413	13.32	10.22	10.43	11.42
624	11	9.68	9.5	10.413	13.2	10.02	10.43	11.42
625	11	9.63	9.5	10.413	13.66	10.27	10.43	11.36
626	11	9.38	9.5	10.413	13.32	10.02	10.48	11.36
627	11	9.34	9.7	10.413	13.26	9.97	10.48	11.67
628	11	9.63	9.7	10.413	13.44	10.27	10.48	11.67
629	11	9.38	9.7	10.413	13.66	10.22	10.48	11.61
630	10.81	9.58	9.46	10.413	13.72	9.97	10.43	11.36
631	10.81	9.58	9.12	10.466	13.72	10.27	10.68	11.67
632	11	9.63	9.5	10.413	13.6	10.17	10.68	11.61
633	11	9.43	9.5	10.413	13.38	10.17	10.43	11.56
634	10.81	9.63	9.5	10.413	13.32	10.17	10.68	11.56
635	10.81	9.58	9.5	10.413	13.26	10.17	10.48	11.61
636	10.81	9.43	9.46	10.413	13.44	10.11	10.48	11.61
637	10.81	9.63	9.46	10.413	13.32	10.11	10.48	11.56
638	10.81	9.38	9.51	10.413	13.32	10.17	10.68	11.61
639	10.81	9.43	9.51	10.363	13.38	10.11	10.68	11.61
640	10.81	9.38	9.31	10.413	13.32	10.11	10.68	11.61
641	10.81	9.38	9.31	10.363	13.38	10.17	10.73	11.56
642	10.81	9.38	9.25	10.363	13.38	10.17	10.73	11.67
643	10.85	9.38	9.31	10.609	12.98	10.22	10.73	11.36
644	10.67	9.34	9.25	10.609	13.09	10.22	10.73	11.56
645	10.67	9.34	9.46	10.609	13.44	10.47	10.43	11.67
646	10.67	9.43	9.46	10.609	13.15	10.47	10.48	11.67
647	10.67	9.43	9.46	10.609	13.26	10.47	10.62	11.36
648	10.67	9.38	9.46	10.609	13.38	10.17	10.48	11.36
649	10.67	9.43	9.5	10.804	13.09	10.41	10.48	11.42
650	10.67	9.48	9.46	10.804	13.15	10.41	10.78	11.36
651	10.67	9.48	9.5	10.804	13.09	10.41	10.78	11.36
652	10.67	9.48	9.46	10.755	13.49	10.11	10.78	11.36
653	10.67	9.39	9.46	11	13.49	10.41	10.84	11.36
654	10.67	9.38	9.46	11	13.38	10.17	10.53	11.31
655	10.67	9.63	9.46	11	13.38	10.17	10.73	11.42
656	10.67	9.63	9.5	11	13.21	10.17	10.59	11.61
657	10.67	9.58	9.25	11	13.38	10.22	10.53	11.36
658	10.63	9.58	9.25	11	13.49	10.22	10.78	11.42
659	10.67	9.58	9.25	11	13.38	10.27	10.53	11.36
660	10.67	9.58	9.21	11.246	13.32	10.27	10.53	11.31
661	10.85	9.58	9.21	11.246	13.49	10.27	10.84	11.67
662	10.67	9.58	9.21	11.246	13.49	10.27	10.73	11.61
663	10.85	9.58	9.25	11.246	13.32	10.22	10.43	11.61
664	10.85	9.58	9.25	11.246	13.49	10.22	10.48	11.61
665	10.85	9.34	9.21	11.246	13.49	10.22	10.48	11.36
666	10.85	9.34	9.46	11.196	13.38	9.97	10.53	11.36
667	10.85	9.34	9.46	11.246	13.32	9.97	10.59	11.42
668	10.67	9.58	9.5	11.196	13.15	9.97	10.53	11.36
669	10.85	9.58	9.5	11.246	13.15	10.22	10.48	11.36
670	10.67	9.58	9.5	11.196	13.03	10.22	10.43	11.42
671	10.67	9.58	9.46	10.95	13.26	10.22	10.48	11.36
672	10.67	9.58	9.26	11.303	13.44	10.22	10.43	11.36
673	10.67	9.58	9.31	11.196	13.38	10.22	10.48	11.17
674	10.67	9.34	9.31	11.196	13.38	10.22	10.48	11.11
675	10.67	9.34	9.31	11.196	13.03	10.27	10.43	11.36
676	10.67	9.34	9.26	11.196	13.44	10.27	10.43	11.17
677	10.67	9.34	9.26	11.196	13.09	10.02	10.48	11.42
678	10.67	9.39	9.26	11.196	13.03	10.27	10.68	11.06
679	10.67	9.39	9.05	11.196	13.21	10.22	10.68	11.17
680	10.67	9.39	9.05	11.196	13.21	9.97	10.73	11.17
681	10.67	9.39	9.31	11.196	12.81	10.22	10.68	11.11
682	10.67	9.39	9.31	11.196	13.09	10.22	10.68	11.11
683	10.67	9.39	9.01	11.196	12.92	9.97	10.63	11.17
684	10.67	9.39	9.01	11.196	12.87	10.22	10.48	11.11
685	10.67	9.39	9.01	10.95	12.87	10.22	10.73	11.11
686	10.67	9.39	9.31	11	12.98	10.22	10.79	11.17
687	10.52	9.14	9.25	11.246	12.92	10.22	10.43	11.17
688	10.52	9.14	9.31	11.246	12.87	10.27	10.63	11.11
689	10.7	9.14	9.31	11	12.81	10.22	10.73	11.11
690	10.52	9.14	9.31	11	13.15	10.16	10.73	11.17
691	10.52	9.14	9.31	11	13.32	10.16	10.84	11.17
692	10.52	8.89	9.26	11	13.04	10.16	10.84	11.11
693	10.52	9.19	9.26	11	12.87	9.97	10.73	11.11
694	10.52	9.19	9.26	11	12.81	10.22	10.68	11.17
695	10.52	9.28	9.26	11	12.81	10.22	10.78	11.11
696	10.52	9.03	9.26	11	12.92	10.22	10.84	10.86
697	10.52	9.24	9.26	11	12.92	10.02	10.78	11.17
698	10.52	9.14	9.31	11	12.87	10.02	10.78	10.92
699	10.52	9.28	9.31	11	12.81	10.02	10.84	11.16
700	10.52	9.33	9.31	11	12.87	10.02	10.68	11.16
701	10.52	9.24	9.05	11	12.87	9.97	10.73	11.22
702	10.52	9.28	9.31	11.05	12.87	9.97	10.78	11.16
703	10.52	9.28	9.31	11.05	12.81	9.97	10.78	11.16
704	10.52	9.19	9.31	11.05	12.92	9.97	10.84	10.97
705	10.52	9.23	9.31	11.05	12.87	9.97	10.84	10.91
706	10.52	9.23	9.26	10.804	12.81	9.72	10.84	10.91
707	10.52	9.28	9.26	11.05	12.81	9.72	10.73	10.97
708	10.52	9.23	9.31	11.05	12.98	9.97	10.68	10.91
709	10.52	9.43	9.25	11.05	13.15	9.77	10.73	10.91
710	10.52	9.48	9.5	11.05	13.09	10.02	10.73	10.97
711	10.52	9.53	9.5	11.05	13.27	9.77	10.84	10.91
712	10.52	9.23	9.46	11.05	12.92	9.77	10.94	10.91
713	10.59	9.23	9.46	11.05	13.15	9.72	10.59	10.97
714	10.63	9.23	9.65	11.05	12.87	9.72	10.78	10.97
715	10.56	9.28	9.4	11.05	13.27	9.67	10.78	10.91
716	10.56	9.48	9.46	11.05	12.87	9.67	10.73	10.97
717	10.56	9.48	9.75	11.05	13.09	9.67	10.84	10.91
718	10.56	9.23	9.7	11.05	13.21	9.72	10.59	10.91
719	10.7	9.23	9.4	10.804	13.15	9.72	10.78	10.97
720	10.56	9.28	9.7	10.804	13.09	9.77	10.59	10.97
721	10.63	9.23	9.46	10.804	13.15	9.77	10.59	10.91
722	10.7	9.23	9.5	10.804	13.15	9.72	10.89	10.97
723	10.63	9.43	9.5	10.804	12.87	9.72	10.53	10.97
724	10.63	9.48	9.5	10.854	13.15	9.72	10.59	10.91
725	10.56	9.53	9.5	10.854	12.92	9.72	10.78	10.91
726	10.7	9.48	9.21	10.854	12.87	9.97	10.89	10.97
727	10.56	9.48	9.26	10.609	12.81	9.72	10.73	10.97
728	10.7	9.43	9.31	10.609	12.92	9.72	10.78	10.91
729	10.7	9.43	9.31	10.659	12.98	10.02	10.78	10.91
730	10.63	9.48	9.31	10.659	12.92	9.77	10.89	10.97
731	10.56	9.48	9.31	10.659	13.04	9.77	10.78	10.97
732	10.63	9.48	9.31	10.659	12.98	9.77	10.89	10.91
733	10.56	9.43	9.26	10.659	12.87	9.72	10.78	10.97
734	10.63	9.23	9.01	10.413	12.92	9.72	10.53	10.97
735	10.56	9.23	9.05	10.413	12.98	9.72	10.48	10.91
736	10.56	9.48	9.05	10.659	12.92	9.47	10.89	10.91
737	10.56	9.19	9.05	10.659	12.87	9.72	10.89	10.97
738	10.56	9.23	9.05	10.659	13.09	9.72	10.84	10.97
739	10.56	9.28	9.05	10.659	12.98	9.72	10.84	10.91
740	10.56	9.48	9.05	10.659	12.98	9.77	10.84	10.97
741	10.56	9.48	9.01	10.659	13.04	9.77	10.73	10.97
742	10.56	9.53	9.01	10.659	12.92	9.77	10.73	10.66
743	10.56	9.48	9.26	10.659	13.21	9.72	10.53	10.91
744	10.52	9.48	9.31	10.659	13.21	9.72	10.53	10.72
745	10.56	9.48	9.31	10.659	13.38	9.72	10.64	10.97
746	10.56	9.48	9.31	10.659	12.92	9.67	10.64	10.96
747	10.56	9.48	9.21	10.659	12.92	9.67	10.64	10.77
748	10.56	9.48	9.26	10.659	13.04	9.67	10.64	10.77
749	10.56	9.48	9.26	10.659	13.04	9.92	10.53	10.71
750	10.56	9.53	9.01	10.659	12.92	9.92	10.73	10.71
751	10.56	9.48	9.05	10.659	12.92	9.97	10.48	10.77
752	10.56	9.48	9.05	10.659	13.04	9.92	10.59	10.71
753	10.52	9.23	9.05	10.659	12.98	9.97	10.53	10.71
754	10.38	9.23	9.05	10.659	12.64	9.92	10.89	10.77
755	10.38	9.23	9.01	10.659	12.64	9.97	10.89	10.71
756	10.38	9.23	9.01	10.708	12.98	9.97	10.94	10.71
757	10.38	9.28	9.05	10.708	12.98	9.97	10.64	10.77
758	10.38	9.23	9.05	10.463	12.69	9.92	10.64	10.47
759	10.38	9.23	9.05	10.463	12.87	9.92	10.64	10.71
760	10.38	9.28	9.05	10.463	12.87	9.92	10.64	10.52
761	10.19	9.28	9.05	10.463	12.98	9.92	10.64	10.71
762	10.38	9.48	9.01	10.463	13.04	9.92	10.59	10.52
763	10.38	9.48	9.06	10.463	12.87	9.92	10.64	10.77
764	10.19	9.23	9.11	10.463	13.09	9.67	10.69	10.47
765	10.38	9.53	8.86	10.463	13.21	9.97	10.44	10.77
766	10.19	9.48	9.11	10.463	13.15	9.97	10.69	10.71
767	10.41	9.23	9.11	10.463	13.09	9.97	10.74	10.57
768	10.38	9.23	9.06	10.463	13.09	9.97	10.74	10.57
769	10.38	9.23	9.01	10.463	13.15	9.67	10.69	10.52
770	10.38	9.48	9.05	10.463	13.21	9.67	10.69	10.57
771	10.23	9.48	9.05	10.463	13.09	9.67	10.69	10.77
772	10.3	9.53	9.31	10.463	13.09	9.97	10.69	10.52
773	10.23	9.53	9.26	10.463	13.15	9.72	10.53	10.57
774	10.3	9.48	9.21	10.463	13.09	9.72	10.69	10.52
775	10.3	9.48	9.25	10.463	13.09	9.72	10.69	10.77
776	10.37	9.53	9.25	10.463	13.21	9.77	10.74	10.57
777	10.37	9.53	9.05	10.463	13.09	9.77	10.69	10.77
778	10.37	9.48	9.05	10.463	13.03	9.77	10.74	10.52
779	10.37	9.48	9.05	10.463	13.21	9.77	10.44	10.57
780	10.37	9.48	9.01	10.463	13.26	9.72	10.33	10.52
781	10.37	9.53	8.96	10.463	13.09	9.72	10.69	10.52
782	10.37	9.53	9	10.463	13.09	9.77	10.44	10.57
783	10.37	9.48	9	10.463	13.21	9.72	10.44	10.52
784	10.37	9.48	9	10.463	13.21	9.67	10.44	10.52
785	10.37	9.53	9	10.513	13.03	9.67	10.69	10.57
786	10.37	9.53	9	10.513	13.15	9.92	10.69	10.57
787	10.37	9.48	9	10.513	13.26	9.92	10.44	10.52
788	10.37	9.23	9.21	10.513	13.21	9.92	10.74	10.57
789	10.37	9.48	9.21	10.513	13.09	9.92	10.74	10.57
790	10.37	9.53	9.21	10.513	13.09	9.92	10.69	10.52
791	10.37	9.48	9.2	10.513	13.15	9.87	10.69	10.32
792	10.37	9.48	9.2	10.513	13.26	9.87	10.44	10.32
793	10.37	9.48	9.45	10.513	13.49	9.87	10.44	10.27
794	10.37	9.48	9.45	10.513	13.32	9.82	10.49	10.32
795	10.56	9.23	9.2	10.267	13.32	9.82	10.44	10.32
796	10.52	9.48	9.2	10.267	13.44	10.11	10.44	10.27
797	10.52	9.28	9.2	10.267	13.38	10.06	10.44	10.27
798	10.52	9.23	9.2	10.267	13.38	9.87	10.44	10.32
799	10.52	9.48	9.2	10.267	13.54	10.11	10.49	10.27
800	10.52	9.53	9.16	10.267	13.6	10.06	10.49	10.27
801	10.52	9.48	9.16	10.267	13.78	10.11	10.44	10.32
802	10.33	9.48	9.16	10.267	13.6	10.11	10.44	10.32
803	10.56	9.48	9.16	10.32	13.6	10.06	10.44	10.32
804	10.33	9.28	9.16	10.267	13.72	10.11	10.49	10.37
805	10.52	9.53	9.2	10.317	13.44	10.01	10.49	10.37
806	10.52	9.53	9.2	10.317	13.26	10.01	10.44	10.32
807	10.52	9.53	9.2	10.317	13.32	10.06	10.44	10.37
808	10.52	9.58	9.2	10.267	13.44	10.06	10.44	10.37
809	10.52	9.28	9.2	10.267	13.32	10.06	10.44	10.32
810	10.52	9.28	9.16	10.267	13.44	10.11	10.49	10.32
811	10.52	9.33	9.21	10.317	13.21	10.11	10.49	10.32
812	10.52	9.28	9.21	10.267	13.09	10.17	10.49	10.32
813	10.52	9.28	9.21	10.317	13.38	10.11	10.69	10.32
814	10.52	9.33	9.25	10.267	13.38	10.06	10.69	10.37
815	10.52	9.33	9	10.563	13.32	10.31	10.44	10.32
816	10.52	9.04	9.25	10.563	13.44	10.31	10.44	10.32
817	10.52	9.28	9.25	10.513	13.49	10.06	10.49	10.37
818	10.52	9.04	9.2	10.513	13.09	10.36	10.49	10.32
819	10.52	9.13	9.16	10.513	13.21	10.36	10.49	10.32
820	10.52	9.09	9.16	10.513	13.21	10.17	10.44	10.37
821	10.52	9.09	9.2	10.513	13.09	10.11	10.44	10.32
822	10.52	9.09	9.45	10.513	13.21	10.06	10.44	10.32
823	10.52	9.13	9.45	10.267	13.38	10.11	10.39	10.32
824	10.52	9.13	9.45	10.513	13.38	10.11	10.44	10.32
825	10.38	9.09	9.45	10.563	13.49	10.11	10.49	10.32
826	10.38	9.09	9.45	10.317	13.09	10.11	10.69	10.57
827	10.38	9.09	9.4	10.563	13.09	10.11	10.44	10.57
828	10.56	9.13	9.4	10.563	13.26	10.11	10.69	10.57
829	10.38	9.13	9.45	10.563	13.09	10.11	10.39	10.32
830	10.38	9.09	9.45	10.317	13.09	9.77	10.44	10.37
831	10.19	9.09	9.45	10.317	13.15	10.01	10.69	10.32
832	10.23	9.13	9.45	10.317	13.09	10.01	10.74	10.32
833	10.23	9.13	9.45	10.317	13.09	10.11	10.74	10.32
834	10.23	9.13	9.4	10.317	13.21	10.11	10.74	10.52
835	10.23	9.04	9.4	10.317	13.09	10.11	10.69	10.52
836	10.23	9.04	9.45	10.317	13.03	10.11	10.69	10.57
837	10.23	9.28	9.5	10.317	13.15	10.06	10.64	10.57
838	10.23	9.28	9.5	10.317	13.15	10.06	10.69	10.52
839	10.05	9.33	9.25	10.317	13.03	10.06	10.69	10.52
840	10.37	9.33	9.5	10.317	13.09	10.06	10.69	10.57
841	10.37	9.53	9.25	10.072	13.09	10.01	10.69	10.71
842	10.37	9.48	9.21	10.317	13.03	10.06	10.69	10.71
843	10.37	9.48	9.25	10.317	13.03	10.11	10.74	10.77
844	10.37	9.53	9.25	10.317	13.03	10.11	10.74	11.02
845	10.3	9.53	9.25	10.317	13.03	9.87	10.69	10.96
846	10.18	9.48	9.25	10.317	12.98	9.92	10.69	11.02
847	10.18	9.48	9.25	10.072	13.03	9.92	10.69	10.97
848	10.18	9.48	9.5	10.317	13.32	9.87	10.64	10.91
849	10.37	9.58	9.5	10.317	12.98	9.87	10.64	10.91
850	10.18	9.33	9.46	10.317	13.38	10.11	10.64	10.97
851	10.37	9.28	9.5	10.317	13.15	10.06	10.69	10.97
852	10.37	9.28	9.5	10.317	13.03	9.82	10.74	10.91
853	10.12	9.09	9.5	10.317	12.98	10.06	10.49	10.97
854	10.18	9.13	9.5	10.317	12.98	10.01	10.49	10.96
855	10.37	9.38	9.5	10.317	13.03	10.11	10.44	10.96
856	10.37	9.38	9.21	10.563	13.03	9.82	10.69	11.02
857	10.37	9.34	9.21	10.563	13.03	10.11	10.44	10.96
858	10.37	9.34	9.46	10.563	13.38	10.11	10.44	10.96
859	10.33	9.28	9.25	10.563	13.09	10.17	10.44	11.02
860	10.33	9.33	9.25	10.563	13.03	10.17	10.49	10.77
861	10.33	9.33	9.25	10.563	13.03	10.17	10.44	10.71
862	10.33	9.33	9.31	10.563	13.09	10.17	10.44	10.77
863	10.33	9.28	9.31	10.563	13.09	9.87	10.69	10.71
864	10.52	9.28	9.21	10.293	13.03	9.92	10.44	10.66
865	10.52	9.33	9.26	10.563	13.32	9.92	10.74	10.52
866	10.52	9.33	9.25	10.563	13.09	10.17	10.49	10.71
867	10.33	9.33	9.25	10.563	13.38	10.11	10.44	10.36
868	10.52	9.28	9.31	10.563	13.32	10.17	10.44	10.36
869	10.52	9.28	9.31	10.563	13.03	10.11	10.44	10.36
870	10.52	9.28	9.51	10.563	13.09	9.82	10.44	10.36
871	10.52	9.33	9.26	10.563	13.32	9.87	10.44	10.36
872	10.33	9.33	9.31	10.317	13.03	10.11	10.49	10.71
873	10.26	9.28	9.31	10.317	13.38	9.87	10.49	10.52
874	10.33	9.34	9.56	10.317	13.09	9.87	10.49	10.47
875	10.52	9.34	9.56	10.317	13.09	9.87	10.44	10.47
876	10.52	9.38	9.5	10.37	13.49	9.87	10.44	10.52
877	10.33	9.13	9.51	10.317	13.15	9.92	10.44	10.47
878	10.33	9.34	9.26	10.317	13.09	9.92	10.49	10.52
879	10.33	9.34	9.31	10.367	13.09	9.92	10.49	10.47
880	10.33	9.38	9.31	10.367	13.15	9.92	10.49	10.71
881	10.33	9.38	9.31	10.317	13.09	9.92	10.49	10.52
882	10.19	9.13	9.26	10.317	13.09	9.97	10.54	10.77
883	10.26	9.09	9.26	10.317	13.21	9.97	10.54	10.77
884	10.37	9.09	9.26	10.317	13.21	9.97	10.49	10.82
885	10.3	9.13	9.31	10.563	13.09	10.22	10.49	10.77
886	10.05	9.13	9.31	10.317	13.09	9.92	10.49	10.82
887	10.3	9.09	9.31	10.317	13.21	9.92	10.49	10.82
888	10.18	9.09	9.11	10.563	13.15	9.92	10.49	10.77
889	10.12	9.13	9.06	10.563	13.09	9.92	10.49	10.82
890	10.12	9.13	9.11	10.563	13.09	9.92	10.24	10.77
891	10.05	9.13	9.11	10.563	13.21	9.92	10.54	10.77
892	10.05	9.09	9.11	10.563	13.21	9.92	10.29	11.07
893	10.05	9.14	9.11	10.563	13.09	9.97	10.29	10.77
894	10.05	9.18	9.11	10.317	13.09	9.92	10.24	10.77
895	10.12	8.93	9.31	10.317	13.49	9.92	10.29	10.82
896	10.18	8.93	9.06	10.317	13.49	9.92	10.24	10.77
897	10.12	9.14	9.36	10.37	13.38	9.92	10.24	10.77
898	10.18	9.09	9.36	10.37	13.32	9.92	10.24	10.82
899	10.18	9.13	9.11	10.37	13.38	9.92	10.24	10.77
900	10.18	9.13	9.36	10.317	13.44	9.97	10.24	10.82
901	10.15	9.13	9.06	10.123	13.09	9.97	10.24	10.82
902	10.26	9.34	9.06	10.123	13.32	10.17	10.29	10.52
903	10.33	9.09	9.06	10.225	13.15	10.11	10.29	10.77
904	10.33	9.38	9.06	10.225	13.44	9.87	10.29	10.77
905	10.23	9.33	9.11	10.526	13.38	10.11	10.29	10.77
906	10.16	9.38	9.36	10.225	13.32	10.17	10.29	10.82
907	10.16	9.09	9.11	10.122	13.44	10.22	10.24	10.82
908	10.23	9.04	9.06	10.122	13.44	10.22	10.19	11.01
909	10.29	9.28	9.06	10.173	13.32	10.22	9.99	11.07
910	10.23	9.34	9.26	10.173	13.09	10.17	10.04	10.82
911	10.29	9.38	9.26	10.473	13.15	10.11	9.99	10.77
912	10.29	9.38	9.31	10.473	13.49	10.11	10.04	10.82
913	10.29	9.09	9.31	10.473	13.32	10.11	10.04	10.77
914	10.29	9.09	9.56	10.37	13.27	10.11	10.04	10.77
915	10.29	9.09	9.26	10.423	13.27	10.22	10.04	10.82
916	10.29	9.13	9.51	10.317	13.09	10.22	9.94	10.57
917	9.97	9.13	9.51	10.37	13.15	10.22	9.94	10.77
918	9.97	9.13	9.51	10.617	13.21	10.01	9.74	10.52
919	9.97	9.13	9.31	10.617	13.15	9.72	9.78	10.82
920	10.01	9.09	9.56	10.37	12.92	9.82	9.78	10.82
921	10.01	9.09	9.56	10.617	13.27	9.82	9.78	10.57
922	10.01	9.18	9.26	10.775	12.87	9.82	9.84	10.87
923	10.01	8.93	9.26	10.473	13.09	9.92	9.84	10.82
924	10.01	9.18	9.26	10.317	13.15	9.97	9.84	10.82
925	10.01	9.13	9.26	10.617	13.21	10.22	9.74	10.87
926	10.19	9.13	9.05	10.317	13.15	10.22	9.69	10.57
927	10.19	9.09	9.11	10.612	13.15	10.11	9.79	10.57
928	10.19	9.09	9.11	10.721	13.27	10.17	9.84	10.57
929	10.01	9.13	9.11	10.423	13.15	10.17	9.58	10.62
930	10.19	9.13	9.06	10.721	13.15	10.17	9.58	10.57
931	10.19	8.88	9.11	10.67	13.27	10.11	9.88	10.57
932	10.05	9.13	9.11	10.473	13.32	10.17	9.49	10.62
933	10.01	8.88	9.16	10.423	13.15	9.97	9.79	10.57
934	10.05	8.84	8.91	10.617	13.09	10.22	9.79	10.57
935	10.05	8.84	8.91	10.721	13.15	10.22	9.58	10.57
936	10.05	8.88	8.91	10.724	13.21	10.17	9.88	10.37
937	10.23	9.13	8.86	10.775	13.15	10.11	9.63	10.37
938	10.23	8.88	8.86	10.563	13.09	10.17	9.84	10.57
939	10.05	8.88	8.86	10.67	13.15	10.11	9.84	10.57
940	10.19	8.84	8.91	10.42	13.15	10.11	9.84	10.62
941	10.19	8.88	8.91	10.37	13.09	10.11	9.79	10.62
942	10.05	8.88	8.91	10.473	13.09	10.11	9.74	10.57
943	10.01	8.88	8.96	10.473	13.27	10.11	9.84	10.57
944	10.05	8.88	8.67	10.473	13.15	10.11	9.84	10.62
945	10.05	8.84	8.91	10.473	13.15	10.42	9.84	10.62
946	10.05	8.84	8.91	10.42	12.92	10.42	9.84	10.57
947	9.86	8.88	8.96	10.473	12.98	10.31	9.84	10.57
948	9.86	8.88	8.96	10.367	12.87	10.36	10.09	10.62
949	9.86	9.13	8.96	10.367	13.15	10.21	9.84	10.82
950	9.86	8.88	8.96	10.42	13.15	10.26	9.84	10.71
951	10.05	8.84	8.91	10.42	13.21	10.31	10.09	10.82
952	9.86	9.13	8.91	10.122	13.15	10.31	10.04	10.87
953	10.05	8.88	8.86	10.122	13.21	10.31	10.09	10.77
954	9.86	8.88	9.11	10.122	13.32	10.31	10.09	10.77
955	9.86	8.88	8.86	10.122	12.92	10.56	10.09	10.82
956	9.86	8.84	9.11	10.367	12.92	10.31	10.09	10.77
957	9.86	8.84	9.11	10.42	13.04	10.31	10.14	10.77
958	9.9	8.88	9.11	10.122	12.92	10.31	10.09	11.07
959	9.9	8.88	9.06	10.122	12.87	10.56	10.09	11.01
960	9.86	8.88	9.11	10.122	12.92	10.56	9.84	10.77
961	9.86	8.88	9.36	10.172	12.98	10.51	10.09	11.07
962	10.05	8.93	9.36	10.172	12.98	10.56	9.99	11.01
963	10.05	8.89	9.31	9.926	12.87	10.26	10.04	10.77
964	10.01	9.18	9.31	9.926	12.92	10.26	9.94	10.82
965	10.01	8.93	9.31	9.926	12.92	10.46	10.04	10.77
966	10.19	8.93	9.31	9.926	12.92	10.16	10.04	10.66
967	10.16	9.18	9.26	9.976	12.92	10.21	10.04	10.82
968	10.16	8.88	9.26	9.976	13.04	10.21	10.03	10.77
969	10.16	8.88	9.36	9.976	12.92	10.21	9.98	10.57
970	10.16	9.13	9.36	9.73	12.92	10.21	10.24	10.57
971	10.16	9.18	9.11	9.68	12.87	10.21	10.24	10.77
972	10.16	9.13	9.11	9.976	12.69	10.36	10.19	10.87
973	10.16	9.08	9.06	9.976	12.92	10.36	10.19	10.62
974	10.16	9.33	9.06	9.78	12.92	10.36	10.19	10.57
975	9.97	9.33	9.06	9.976	12.87	10.31	10.19	10.62
976	9.97	9.28	9.11	9.976	12.92	10.26	10.19	10.57
977	10.16	9.28	9.11	9.976	12.92	10.31	10.24	10.57
978	10.16	9.38	9.11	9.926	12.92	10.26	10.44	10.62
979	10.16	9.33	9.11	9.976	12.58	10.06	10.44	10.62
980	10.16	9.33	9.06	9.926	12.87	10.06	10.39	10.57
981	10.16	9.33	9.06	9.976	12.92	10.06	10.33	10.57
982	10.16	9.28	9.06	9.926	12.92	10.06	10.33	10.62
983	10.16	9.23	9.11	9.926	12.92	10.06	10.44	10.57
984	10.16	8.99	9.11	9.68	12.87	10.11	10.44	10.62
985	10.16	9.08	9.11	9.73	12.98	10.06	10.24	10.62
986	10.16	9.08	9.11	9.73	12.98	10.06	10.19	10.57
987	10.19	9.08	9.06	9.78	13.09	10.31	10.19	10.62
988	10.19	9.04	9.31	9.73	12.92	10.31	10.19	10.62
989	10.19	9.04	9.36	9.73	12.87	10.31	10.14	10.57
990	10.19	9.04	9.36	9.926	12.98	10.36	10.14	10.62
991	10.01	9.08	9.36	9.926	12.69	10.36	10.24	10.37
992	10.01	9.08	9.31	9.926	12.75	10.36	10.24	10.32
993	10.01	9.08	9.31	9.926	12.92	10.36	10.29	10.32
994	10.01	9.04	9.51	9.926	12.87	10.31	10.49	10.62
995	10.01	9.09	9.46	9.926	12.69	10.31	10.49	10.57
996	10.19	9.09	9.5	9.926	13.04	10.31	10.49	10.62
997	10.19	9.13	9.5	9.926	12.69	10.56	10.49	10.62
998	10.01	8.88	9.5	9.926	12.92	10.51	10.14	10.57
999	10.01	8.88	9.5	9.926	12.87	10.56	10.49	10.37
1000	10.19	8.88	9.5	9.926	13.04	10.61	10.49	10.62
1001	10.19	8.84	9.75	9.926	12.75	10.61	10.49	10.57
1002	10.19	8.84	9.7	9.926	12.92	10.61	10.49	10.62
1003	10.01	8.84	9.75	10.172	12.87	10.51	10.49	10.57
1004	10.01	8.84	9.75	10.172	12.92	10.51	10.49	10.52
1005	10.01	8.84	9.75	10.172	12.75	10.51	10.29	10.57
1006	10.01	8.88	9.5	10.172	12.58	10.56	10.24	10.57
1007	10.01	8.88	9.5	10.172	12.58	10.56	10.24	10.14
1008	10.05	8.84	9.5	10.122	12.69	10.56	10.24	10.87
1009	10.05	8.84	9.46	10.417	12.69	10.56	10.19	10.77
1010	10.05	8.64	9.46	10.367	12.58	10.61	10.19	10.82
1011	10.05	8.89	9.46	10.417	12.64	10.61	10.14	10.82
1012	10.05	8.89	9.5	10.367	12.69	10.36	10.14	10.77
1013	10.05	8.89	9.5	10.367	12.58	10.36	10.24	11.01
1014	10.05	8.68	9.6	10.367	12.64	10.36	10.24	11.07
1015	10.05	8.68	9.31	10.367	12.69	10.36	10.29	11.01
1016	10.01	8.68	9.31	10.367	12.64	10.36	10.24	10.82
1017	10.01	8.89	9.31	10.122	12.3	10.36	10.29	10.87
1018	10.01	8.64	9.26	10.367	12.69	10.36	10.29	10.82
1019	10.01	8.64	9.26	10.367	12.64	10.36	10.34	10.82
1020	10.01	8.84	9.26	10.367	12.64	10.36	10.29	10.82
1021	10.01	8.88	9.25	10.367	12.7	10.31	10.29	10.77
1022	10.01	8.88	9.55	10.367	12.64	10.06	10.24	10.77
1023	10.01	8.88	9.5	10.367	12.58	10.06	10.24	10.82
1024	10.01	8.88	9.5	10.367	12.64	10.06	10.14	10.82
1025	10.19	8.83	9.5	10.367	12.64	10.31	10.08	10.57
1026	10.23	8.79	9.46	10.367	12.58	10.31	10.44	10.62
1027	10.05	8.79	9.25	10.317	12.53	10.31	10.44	10.57
1028	10.23	8.79	9.25	10.367	12.92	10.11	10.49	10.62
1029	10.05	8.79	9.55	10.367	12.64	10.11	10.44	10.62
1030	10.05	8.83	9.6	10.367	12.92	10.36	10.69	10.57
1031	10.05	8.88	9.55	10.367	12.98	10.36	10.64	10.52
1032	10.05	8.88	9.31	10.367	13.04	10.11	10.53	10.57
1033	10.05	8.88	9.25	10.367	12.92	10.11	10.48	10.68
1034	10.01	8.88	9.31	10.367	12.87	10.11	10.48	10.52
1035	10.01	8.5	9.25	10.367	12.64	10.17	10.59	10.37
1036	10.19	8.75	9.25	10.122	12.64	10.17	10.59	10.57
1037	10.19	8.5	9.55	10.122	12.58	10.42	10.59	10.32
1038	10.19	8.5	9.5	10.367	12.58	10.17	10.59	10.27
1039	10.19	8.5	9.6	10.367	12.58	10.42	10.53	10.32
1040	10.19	8.5	9.35	10.122	12.64	10.17	10.48	10.57
1041	10.19	8.5	9.3	10.367	12.64	10.36	10.48	10.52
1042	10.23	8.5	9.6	10.122	12.64	10.36	10.64	10.37
1043	10.05	8.26	9.5	10.172	12.58	10.11	10.64	10.32
1044	10.05	8.55	9.5	10.172	12.41	10.11	10.64	10.27
1045	10.05	8.5	9.31	10.172	12.64	10.36	10.64	10.57
1046	10.05	8.5	9.56	10.172	12.64	10.42	10.39	10.57
1047	10.05	8.5	9.25	10.172	12.58	10.17	10.28	10.52
1048	10.05	8.5	9.6	10.172	12.58	10.17	10.28	10.62
1049	10.05	8.5	9.55	10.172	12.41	10.11	10.39	10.57
1050	10.05	8.5	9.6	9.926	12.7	10.11	10.39	10.52
1051	10.05	8.5	9.55	9.926	12.7	10.11	10.69	10.57
1052	10.05	8.55	9.55	9.926	12.64	10.11	10.69	10.57
1053	10.05	8.31	9.5	10.172	12.64	10.17	10.59	10.52
1054	10.05	8.31	9.5	10.172	12.35	10.17	10.59	10.57
1055	9.86	8.31	9.55	10.172	12.7	10.17	10.64	10.87
1056	9.86	8.31	9.6	9.926	12.7	10.17	10.64	10.52
1057	9.86	8.31	9.35	9.926	12.36	10.11	10.69	10.57
1058	9.9	8.31	9.4	10.172	12.36	10.11	10.69	10.87
1059	9.9	8.31	9.4	10.172	12.47	10.11	10.64	10.82
1060	9.9	8.31	9.4	10.172	12.41	10.11	10.64	10.87
1061	9.9	8.26	9.35	10.172	12.36	10.11	10.64	10.77
1062	9.9	8.31	9.31	10.172	12.41	10.17	10.64	10.87
1063	9.9	8.55	8.92	10.172	12.41	10.17	10.53	10.87
1064	9.9	8.55	9.1	10.172	12.7	9.92	10.39	10.77
1065	9.9	8.55	9.05	9.926	12.36	10.17	10.39	10.82
1066	9.9	8.31	9.1	10.172	12.36	10.17	10.64	11.07
1067	9.9	8.55	9.1	10.172	12.41	10.17	10.39	11.01
1068	9.9	8.31	9.05	10.172	12.41	10.17	10.64	11.07
1069	9.9	8.55	9.15	10.172	12.36	10.17	10.44	11.07
1070	9.9	8.55	9.11	10.172	12.36	10.17	10.39	11.07
1071	9.86	8.5	9.1	10.172	12.41	10.17	10.39	10.82
1072	9.86	8.55	9.31	10.172	12.41	10.17	10.44	10.71
1073	9.86	8.5	9.31	10.172	12.36	10.11	10.39	10.82
1074	10.05	8.31	9.25	10.172	12.41	10.17	10.23	10.82
1075	10.05	8.55	9.25	10.172	12.41	10.11	10.48	11.12
1076	10.05	8.55	9.21	10.172	12.36	10.11	10.64	11.07
1077	10.05	8.55	9.3	10.172	12.36	9.87	10.28	10.77
1078	10.05	8.31	9.5	10.172	12.7	9.87	10.64	10.82
1079	10.05	8.31	9.55	10.172	12.64	9.87	10.64	10.82
1080	10.01	8.5	9.5	9.926	12.58	9.87	10.74	10.77
1081	10.01	8.5	9.5	10.221	12.58	9.87	10.64	10.82
1082	10.19	8.5	9.5	9.976	12.64	9.87	10.69	10.82
1083	10.19	8.5	9.56	9.976	12.64	9.92	10.64	10.77
1084	10.01	8.5	9.5	9.976	12.58	9.72	10.69	10.82
1085	10.16	8.75	9.51	9.976	12.87	9.97	10.64	10.82
1086	10.16	8.7	9.56	10.221	12.92	9.97	10.64	10.77
1087	10.16	8.7	9.6	10.221	12.64	9.97	10.64	10.82
1088	10.16	8.75	9.31	10.221	12.92	9.72	10.64	10.57
1089	10.16	8.75	9.35	9.976	12.58	9.97	10.59	10.52
1090	10.16	8.75	9.31	9.976	12.64	9.97	10.59	10.57
1091	10.16	8.75	9.31	9.976	12.75	9.92	10.84	10.57
1092	10.16	8.75	9.31	9.976	12.81	9.92	10.84	10.77
1093	10.34	8.5	9.31	9.976	12.64	9.92	10.84	10.57
1094	10.34	8.5	9.05	9.976	12.64	9.87	10.84	10.57
1095	10.34	8.55	9.1	9.976	12.58	9.97	10.84	10.52
1096	10.16	8.55	9.05	9.976	12.3	9.97	10.84	10.52
1097	10.34	8.55	9.05	9.976	12.64	9.97	10.84	10.57
1098	10.16	8.55	9.1	9.976	12.35	9.97	10.84	10.57
1099	10.16	8.55	8.8	9.976	12.41	9.97	10.89	10.52
1100	10.3	8.55	8.8	9.976	12.3	9.92	10.89	10.82
1101	10.34	8.55	8.86	9.976	12.58	9.67	10.64	10.82
1102	10.3	8.55	8.86	9.976	12.64	9.87	10.64	10.77
1103	10.3	8.55	8.86	9.976	12.41	9.92	10.59	10.57
1104	10.3	8.31	8.9	9.976	12.41	9.92	10.64	10.57
1105	10.3	8.55	8.95	9.976	12.36	9.97	10.59	10.52
1106	10.3	8.55	8.9	9.976	12.3	9.97	10.53	10.57
1107	10.3	8.5	8.9	9.976	12.41	9.72	10.64	10.57
1108	10.48	8.55	8.8	9.976	12.41	9.97	10.64	10.57
1109	10.48	8.55	8.85	9.976	12.41	9.72	10.39	10.57
1110	10.45	8.5	8.8	9.976	12.36	9.72	10.64	10.93
1111	10.48	8.55	8.8	9.976	12.36	9.72	10.44	10.57
1112	10.48	8.55	8.8	10.026	12.41	9.72	10.44	10.67
1113	10.48	8.55	9.05	10.026	12.41	9.67	10.28	10.67
1114	10.3	8.55	9.05	10.026	12.36	9.67	10.44	10.87
1115	10.3	8.55	9.05	10.026	12.36	9.67	10.69	10.67
1116	10.3	8.31	9.05	9.976	12.36	9.67	10.44	10.62
1117	10.3	8.31	9.05	10.026	12.41	9.67	10.49	10.62
1118	10.3	8.55	9.05	10.026	12.13	9.97	10.44	10.62
1119	10.3	8.36	9.05	10.026	12.07	9.72	10.69	10.67
1120	10.3	8.36	9.05	10.026	12.07	9.97	10.44	10.62
1121	10.3	8.36	9	10.026	12.41	9.72	10.44	10.57
1122	10.34	8.36	8.91	10.026	12.41	9.72	10.44	10.67
1123	10.09	8.36	8.71	10.026	12.07	9.72	10.49	10.62
1124	10.34	8.36	8.8	10.026	12.07	9.72	10.49	10.67
1125	10.34	8.11	9.05	10.026	12.13	9.72	10.49	10.42
1126	10.12	8.11	9.05	10.077	12.41	9.72	10.49	10.37
1127	10.16	8.11	8.85	10.026	12.36	9.72	10.44	10.62
1128	10.16	8.11	9.1	10.077	12.07	9.72	10.44	10.67
1129	10.34	8.11	9.05	10.026	12.23	9.67	10.44	10.62
1130	10.16	8.16	9.05	10.026	12.41	9.67	10.44	10.62
1131	10.16	8.16	8.85	10.026	12.13	9.72	10.44	10.67
1132	10.34	8.41	8.76	9.976	12.07	9.72	10.44	10.37
1133	10.16	8.41	8.85	10.026	12.13	9.72	10.49	10.37
1134	10.16	8.36	8.89	10.027	12.13	9.72	10.49	10.37
1135	10.34	8.36	8.89	10.078	12.13	9.67	10.49	10.67
1136	10.27	8.36	8.85	9.976	12.07	9.77	10.44	10.62
1137	10.16	8.36	8.89	10.077	11.89	9.77	10.19	10.73
1138	10.16	8.36	8.8	9.976	12.18	9.77	10.44	10.78
1139	10.16	8.36	8.86	10.271	12.13	9.77	10.19	10.42
1140	10.16	8.36	8.86	10.026	12.07	9.77	10.49	10.53
1141	10.16	8.36	8.81	10.026	11.84	9.77	10.49	10.58
1142	10.16	8.36	8.86	10.026	11.95	9.72	10.49	10.73
1143	10.34	8.36	8.8	10.026	11.84	9.77	10.24	10.78
1144	10.16	8.36	8.85	10.271	11.79	9.77	10.24	10.58
1145	10.3	8.36	8.8	10.274	11.84	9.52	10.24	10.78
1146	10.34	8.36	8.55	9.976	11.95	9.52	10.24	10.78
1147	10.34	8.31	8.6	10.271	11.84	9.47	10.24	10.83
1148	10.34	8.36	8.85	10.271	11.79	9.52	10.29	10.53
1149	10.16	8.36	8.85	10.026	11.79	9.57	10.24	10.53
1150	10.34	8.31	8.85	10.026	11.89	9.57	10.29	10.58
1151	10.16	8.31	8.85	10.026	11.84	9.57	10.29	10.53
1152	10.16	8.31	8.64	10.026	11.79	9.61	10.29	10.58
1153	10.16	8.31	8.55	10.026	11.79	9.61	10.29	10.58
1154	10.16	8.31	8.8	10.026	11.84	9.61	10.24	10.78
1155	10.16	8.31	8.85	10.026	11.9	9.51	10.24	10.83
1156	10.34	8.31	8.89	10.271	11.85	9.57	10.24	10.78
1157	10.16	8.36	8.85	10.324	11.85	9.57	10.24	10.78
1158	10.16	8.36	8.85	10.271	11.84	9.61	10.24	10.73
1159	10.16	8.36	8.8	10.324	11.9	9.57	10.24	10.53
1160	10.16	8.36	8.85	10.077	11.9	9.61	10.24	10.53
1161	10.34	8.36	8.85	10.324	11.85	9.61	10.04	10.58
1162	10.16	8.11	8.85	10.026	11.85	9.61	10.04	10.53
1163	10.16	8.11	8.8	10.271	11.9	9.52	10.04	10.53
1164	10.16	8.11	8.85	10.271	11.9	9.27	10.04	10.58
1165	10.16	8.36	8.8	10.271	11.85	9.52	10.04	10.53
1166	10.16	8.11	8.85	10.271	12.13	9.52	10.04	10.53
1167	10.19	8.11	8.9	10.324	12.07	9.47	10.04	10.33
1168	10.19	8.36	8.9	10.428	11.84	9.47	10.04	10.58
1169	10.19	8.36	8.89	10.179	11.84	9.22	10.04	10.27
1170	10.19	8.36	9.1	10.376	11.85	9.22	10.04	10.53
1171	10.16	8.36	9.15	10.428	12.07	9.32	10.04	10.58
1172	10.19	8.36	9.15	10.271	11.79	9.32	10.04	10.53
1173	10.19	8.36	9.1	10.376	12.13	9.27	10.04	10.58
1174	10.19	8.36	9.09	10.376	11.84	9.32	10.04	10.38
1175	10.38	8.36	9.14	10.376	12.13	9.32	9.99	10.58
1176	10.34	8.36	9.09	10.376	12.13	9.27	9.99	10.58
1177	10.34	8.36	9.09	10.376	12.07	9.27	10.04	10.63
1178	10.34	8.36	9.35	10.179	11.79	9.27	9.99	10.58
1179	10.34	8.36	9.05	10.428	12.07	9.27	10.04	10.33
1180	10.34	8.36	9.35	10.428	12.13	9.27	9.99	10.33
1181	10.34	8.36	9.35	10.376	12.13	9.52	10.09	10.38
1182	10.34	8.36	9.14	10.376	12.18	9.47	10.04	10.58
1183	10.34	8.36	9.14	10.324	12.13	9.61	10.04	10.58
1184	10.34	8.36	9.14	10.376	12.13	9.57	10.04	10.58
1185	10.34	8.36	9.09	10.376	12.13	9.52	9.84	10.53
1186	10.16	8.36	9.09	10.376	12.07	9.52	9.84	10.58
1187	10.16	8.36	9.09	10.428	12.07	9.52	10.09	10.58
1188	10.34	8.41	9.05	10.376	12.23	9.52	9.78	10.63
1189	10.34	8.41	9.09	10.376	12.13	9.52	9.84	10.58
1190	10.34	8.41	9.09	10.376	12.29	9.47	9.84	10.58
1191	10.16	8.16	9.09	10.376	12.18	9.47	9.78	10.58
1192	10.16	8.16	9.14	10.376	12.13	9.52	9.79	10.58
1193	10.16	8.16	9.05	10.428	12.13	9.32	9.84	10.58
1194	10.16	8.16	9.05	10.428	12.13	9.27	9.84	10.63
1195	10.16	8.41	9.25	10.376	12.07	9.52	9.84	10.58
1196	10.16	8.16	9	10.128	12.13	9.52	9.84	10.53
1197	10.16	8.16	9	10.376	12.13	9.27	9.84	10.63
1198	10.19	8.16	9.05	10.326	12.18	9.52	9.88	10.63
1199	10.19	8.16	9.01	10.376	12.23	9.27	9.88	10.58
1200	10.19	8.16	9.05	10.376	12.23	9.22	9.88	10.63
1201	10.19	8.16	9.05	10.428	12.13	9.27	9.88	10.58
1202	10.19	8.41	9.05	10.428	11.84	9.27	9.88	10.58
1203	10.01	8.41	9.05	10.428	11.84	9.27	9.88	10.63
1204	10.01	8.16	9.1	10.376	12.13	9.27	9.88	10.58
1205	10.19	8.41	9.05	10.376	11.79	9.27	9.88	10.33
1206	10.19	8.41	8.8	10.376	12.23	9.27	9.84	10.38
1207	10.19	8.41	8.76	10.376	12.23	9.27	9.84	10.38
1208	10.01	8.16	9.05	10.376	12.18	9.22	9.58	10.33
1209	10.19	8.16	8.8	10.376	12.12	9.22	9.58	10.38
1210	10.19	8.16	8.85	10.428	12.07	9.22	9.58	10.33
1211	10.01	8.16	8.86	10.376	12.07	9.22	9.58	10.07
1212	10.19	8.16	8.9	10.428	12.3	9.27	9.84	10.12
1213	10.19	8.16	8.9	10.376	12.35	9.32	9.79	10.07
1214	10.19	8.16	8.85	10.376	12.46	9.32	9.84	10.07
1215	10.19	8.16	8.86	10.376	12.35	9.32	9.84	10.07
1216	10.19	8.16	8.86	10.376	12.35	9.32	9.74	10.27
1217	10.19	8.16	8.95	10.376	12.35	9.32	9.58	10.27
1218	10.19	8.16	8.95	10.376	12.35	9.32	9.54	10.33
1219	10.19	8.16	8.9	10.376	12.75	9.27	9.54	10.27
1220	10.01	8.16	8.95	10.376	12.69	9.02	9.58	10.33
1221	10.19	8.16	8.9	10.428	12.64	9.02	9.49	10.33
1222	10.19	7.92	8.69	10.376	12.53	9.07	9.58	10.27
1223	10.19	7.92	8.65	10.376	12.58	9.32	9.54	10.27
1224	10.19	7.92	8.69	10.376	12.69	9.32	9.58	10.33
1225	10.19	7.92	8.69	10.324	12.64	9.32	9.58	10.27
1226	10.01	7.92	8.69	10.077	12.64	9.27	9.68	10.27
1227	10.19	7.92	8.69	10.128	12.58	9.32	9.64	10.33
1228	10.19	7.92	8.69	10.376	12.3	9.07	9.64	10.27
1229	10.19	7.92	8.74	10.077	12.46	9.07	9.64	10.53
1230	10.01	7.92	9	10.376	12.35	9.32	9.64	10.58
1231	10.01	8.16	8.91	10.324	12.35	9.32	9.64	10.53
1232	10.01	7.92	8.7	10.271	12.35	9.07	9.64	10.48
1233	10.01	8.16	8.91	10.271	12.35	9.27	9.68	10.78
1234	9.97	7.92	8.95	10.271	12.35	9.07	9.64	10.73
1235	10.01	8.16	8.61	10.271	12.35	9.02	9.54	10.73
1236	10.01	8.16	8.61	10.271	12.35	9.02	9.64	10.78
1237	9.97	8.16	8.91	10.271	12.02	9.02	9.64	10.73
1238	10.16	8.16	8.95	10.271	12.02	9.27	9.59	10.73
1239	10.16	7.92	8.95	10.517	12.07	9.32	9.59	10.78
1240	10.16	7.92	8.95	10.517	12.07	9.07	9.64	10.78
1241	10.16	7.92	8.7	10.517	12.02	9.07	9.64	10.73
1242	9.97	7.92	8.91	10.517	12.02	9.07	9.38	10.78
1243	9.97	7.92	8.66	10.517	12.02	9.07	9.38	10.78
1244	10.16	7.92	8.66	10.271	12.07	9.07	9.38	10.73
1245	10.16	8.16	8.66	10.517	12.07	9.07	9.38	10.73
1246	10.01	8.16	8.61	10.517	12.02	9.02	9.38	10.78
1247	10.19	7.92	8.91	10.271	12.07	9.02	9.38	10.48
1248	10.19	7.92	8.91	10.271	12.07	9.02	9.38	10.48
1249	10.19	7.92	8.95	10.271	12.12	9.07	9.38	10.78
1250	10.01	8.16	8.9	10.271	12.07	9.32	9.38	10.48
1251	10.19	8.16	8.9	10.271	12.3	9.07	9.38	10.48
1252	10.01	8.16	8.95	10.271	12.3	9.07	9.38	10.48
1253	10.01	8.16	8.95	10.271	12.3	9.32	9.38	10.53
1254	10.01	7.92	8.95	10.271	12.35	9.32	9.38	10.48
1255	10.01	8.16	8.91	10.271	12.12	9.23	9.38	10.48
1256	10.01	8.16	8.91	10.271	12.07	9.27	9.38	10.53
1257	10.01	8.16	8.61	10.271	12.07	9.07	9.38	10.73
1258	10.01	7.92	8.61	10.271	12.02	9.32	9.38	10.73
1259	10.01	7.92	8.7	10.271	11.96	9.07	9.38	10.53
1260	10.01	7.97	8.7	10.271	12.3	9.07	9.38	10.53
1261	10.01	7.97	8.66	10.271	12.41	9.07	9.38	10.73
1262	10.01	7.97	8.66	10.321	12.46	9.02	9.38	10.73
1263	10.01	7.72	8.66	10.321	12.18	9.02	9.38	10.78
1264	10.01	7.97	8.66	10.321	12.35	9.02	9.29	10.73
1265	10.01	7.97	8.66	10.321	12.07	9.02	9.38	10.48
1266	10.01	7.72	8.66	10.321	12.07	9.02	9.38	10.53
1267	10.01	7.97	8.66	10.321	12.3	9.07	9.38	10.48
1268	10.01	7.72	8.61	10.321	12.3	9.07	9.38	10.48
1269	10.19	7.97	8.61	10.321	12.3	9.07	9.38	10.53
1270	10.01	7.72	8.66	10.321	12.07	9.07	9.38	10.53
1271	10.01	7.97	8.66	10.321	12.12	9.07	9.43	10.53
1272	10.01	7.72	8.66	10.321	12.35	9.07	9.38	10.58
1273	10.01	7.72	8.66	10.321	12.02	9.07	9.48	10.53
1274	10.01	7.72	8.66	10.321	12.35	9.07	9.43	10.48
1275	10.01	7.72	8.66	10.321	12.07	9.02	9.43	10.58
1276	10.01	7.72	8.66	10.321	12.35	9.02	9.43	10.53
1277	10.01	7.72	8.66	10.321	12.12	9.02	9.43	10.33
1278	10.01	7.72	8.66	10.321	12.18	9.02	9.34	10.58
1279	10.01	7.97	8.61	10.271	12.18	9.02	9.34	10.53
1280	10.05	7.97	8.61	10.271	12.3	9.07	9.39	10.53
1281	10.01	7.97	8.37	10.271	12.24	9.07	9.64	10.58
1282	10.01	7.97	8.46	10.271	12.35	9.07	9.59	10.53
1283	10.01	7.97	8.46	10.517	12.4	9.07	9.64	10.58
1284	10.19	7.92	8.71	10.517	12.4	9.07	9.69	10.53
1285	10.19	7.92	8.46	10.517	12.64	9.07	9.69	10.73
1286	10.01	7.92	8.46	10.517	12.52	9.07	9.69	10.83
1287	10.01	7.97	8.46	10.517	12.58	8.82	9.69	10.83
1288	10.19	7.92	8.46	10.517	12.52	8.82	9.64	10.73
1289	10.01	7.97	8.46	10.467	12.58	9.07	9.38	10.83
1290	10.19	7.97	8.42	10.467	12.63	8.82	9.43	10.83
1291	10.01	7.92	8.42	10.712	12.63	9.02	9.59	10.78
1292	10.01	7.92	8.42	10.712	12.58	9.02	9.38	10.48
1293	9.97	7.92	8.46	10.712	12.3	9.02	9.64	10.58
1294	9.97	7.92	8.46	10.957	12.58	9.02	9.64	10.53
1295	9.97	7.92	8.46	10.908	12.64	9.02	9.64	10.78
1296	9.97	7.92	8.46	10.908	12.69	9.02	9.43	10.83
1297	9.97	7.92	8.41	11.153	12.63	9.02	9.68	10.83
1298	9.97	7.92	8.66	11.153	12.63	9.07	9.64	10.78
1299	9.97	7.92	8.37	11.103	12.58	9.02	9.64	10.78
1300	9.97	7.92	8.61	11.103	12.52	9.07	9.38	10.83
1301	9.97	7.92	8.61	11.153	12.47	9.07	9.59	10.78
1302	9.97	7.92	8.66	11.153	12.52	9.07	9.64	10.83
1303	9.97	7.97	8.41	11.21	12.63	9.12	9.64	10.83
1304	9.97	7.97	8.66	11.153	12.63	9.12	9.64	10.78
1305	9.83	7.97	8.66	11.153	12.4	8.98	9.68	10.73
1306	9.83	7.92	8.46	11.153	12.46	9.08	9.43	10.78
1307	9.83	7.92	8.67	11.153	12.58	8.83	9.64	10.78
1308	9.83	8.16	8.67	11.153	12.3	8.83	9.64	11.03
1309	9.83	8.16	8.67	11.153	12.53	8.87	9.64	10.78
1310	9.83	7.92	8.67	11.153	12.3	8.87	9.64	10.78
1311	9.83	8.16	8.66	11.153	12.3	9.12	9.64	10.78
1312	9.83	8.16	8.66	10.957	12.12	9.12	9.64	10.78
1313	9.97	8.16	8.71	10.957	12.17	9.08	9.64	10.78
1314	9.97	8.16	8.46	10.957	12.06	8.83	9.49	10.73
1315	9.97	8.16	8.71	10.957	12.01	9.08	9.64	10.78
1316	9.97	8.16	8.71	10.957	11.96	9.08	9.64	10.83
1317	10.01	7.92	8.46	10.957	12.01	9.08	9.59	10.58
1318	10.01	8.16	8.42	10.957	12.12	9.12	9.58	10.53
1319	9.83	8.16	8.42	11.153	12.12	9.12	9.64	10.58
1320	9.83	7.92	8.46	11.153	12.12	9.08	9.58	10.58
1321	9.83	7.92	8.42	11.153	12.07	9.08	9.63	10.27
1322	9.83	7.92	8.71	11.153	12.07	9.08	9.64	10.38
1323	9.86	7.92	8.46	11.153	12.18	8.83	9.64	10.33
1324	9.86	7.92	8.71	11.153	12.18	9.08	9.58	10.53
1325	9.86	7.92	8.46	11.153	12.18	9.08	9.64	10.58
1326	9.86	7.92	8.46	11.153	12.18	9.08	9.58	10.58
1327	9.86	7.92	8.46	11.398	12.07	8.87	9.54	10.53
1328	9.86	7.92	8.46	11.398	12.02	9.07	9.58	10.27
1329	9.86	7.92	8.46	11.153	12.01	9.07	9.79	10.58
1330	9.86	7.92	8.46	11.153	12.18	9.02	9.84	10.58
1331	9.9	7.92	8.42	11.348	12.23	9.02	9.84	10.33
1332	9.9	8.16	8.42	11.348	12.18	9.02	9.88	10.33
1333	9.9	8.16	8.5	11.348	12.3	9.02	9.88	10.58
1334	9.9	8.16	8.5	11.348	12.3	9.07	9.84	10.27
1335	9.9	7.92	8.29	11.398	11.96	9.07	9.84	10.33
1336	9.9	8.16	8.29	11.398	12.07	9.07	9.64	10.33
1337	9.9	7.92	8.29	11.398	12.3	9.07	9.49	10.27
1338	9.9	7.92	8.54	11.153	12.07	9.02	9.89	10.58
1339	9.9	7.92	8.59	11.153	12.3	9.08	9.84	10.33
1340	9.9	7.92	8.54	11.398	12.02	9.27	9.84	10.33
1341	9.9	7.97	8.38	11.153	12.24	9.32	9.88	10.33
1342	9.9	7.97	8.6	11.153	12.3	9.07	9.88	10.53
1343	9.9	7.97	8.6	11.153	12.35	9.12	9.84	10.58
1344	9.9	7.97	8.54	11.153	12.35	9.12	9.84	10.58
1345	9.72	7.97	8.6	11.153	12.24	9.08	9.79	10.53
1346	9.83	7.92	8.34	10.908	12.3	9.08	9.74	10.58
1347	9.77	7.92	8.55	11.153	12.3	9.08	9.84	10.33
1348	9.73	7.92	8.51	10.908	12.3	9.08	9.78	10.27
1349	9.8	7.92	8.51	10.908	12.3	9.08	9.78	10.33
1350	9.8	8.11	8.46	11.153	12.25	9.12	9.83	10.58
1351	9.8	8.11	8.46	11.103	12.25	8.87	9.83	10.27
1352	9.8	8.11	8.46	11.103	12.02	8.87	9.78	10.33
1353	9.98	8.11	8.46	11.348	12.3	8.87	9.78	10.33
1354	9.76	8.06	8.3	11.348	12.3	8.87	9.78	10.27
1355	10.01	8.06	8.21	11.348	12.3	8.87	9.78	10.58
1356	10.01	8.36	8.51	11.348	12.3	8.83	9.74	10.58
1357	10.01	8.11	8.51	11.348	12.3	8.83	9.84	10.58
1358	10.01	8.36	8.46	11.348	12.35	8.83	9.84	10.38
1359	10.01	8.11	8.46	11.348	12.35	8.87	9.78	10.33
1360	9.84	8.11	8.5	11.348	12.3	8.83	9.78	10.33
1361	9.84	8.11	8.46	11.348	12.02	8.87	9.83	10.43
1362	9.84	8.11	8.45	11.348	12.07	8.87	9.78	10.33
1363	9.84	8.11	8.66	11.348	12.07	8.87	9.78	10.33
1364	9.84	8.11	8.7	11.348	12.07	8.87	9.78	10.63
1365	9.84	8.11	8.9	11.348	12.3	8.83	9.74	10.33
1366	9.9	8.11	8.9	11.348	12.02	8.83	9.74	10.27
1367	9.97	8.11	8.86	11.348	12.3	8.83	9.79	10.33
1368	10.02	8.36	8.86	11.348	12.35	8.83	9.84	10.38
1369	10.12	8.11	8.56	11.348	12.35	8.83	10.04	10.58
1370	10.05	8.16	8.86	11.16	12.3	8.87	10.09	10.33
1371	10.05	8.16	8.65	11.348	12.3	8.87	10.04	10.38
1372	9.98	8.16	8.65	11.348	12.3	8.87	10.04	10.33
1373	9.98	8.16	8.65	11.103	12.3	8.87	9.98	10.27
1374	9.98	8.16	8.9	11.348	12.35	8.88	9.89	10.38
1375	10.05	8.16	8.61	11.348	12.35	8.88	10.24	10.33
1376	10.12	7.92	8.69	11.348	12.35	8.88	10.24	10.33
1377	9.98	7.92	8.69	11.348	12.3	8.83	10.49	10.27
1378	9.98	7.92	8.69	11.348	12.3	8.88	10.39	10.33
1379	10.12	8.21	8.74	11.348	12.3	8.87	10.39	10.33
1380	10.12	8.21	8.79	11.348	12.35	8.92	10.39	10.58
1381	10.09	8.21	8.74	11.348	12.35	8.92	10.33	10.53
1382	9.9	8.21	8.66	11.348	12.35	8.92	10.39	10.33
1383	10.09	8.21	8.45	11.348	12.3	8.83	10.39	10.58
1384	9.9	8.16	8.46	11.299	12.3	8.83	10.39	10.27
1385	9.9	8.21	8.5	11.348	12.3	8.83	10.64	10.33
1386	10.02	8.21	8.42	11.348	12.35	8.83	10.39	10.33
1387	10.02	8.21	8.46	11.348	12.35	8.83	10.64	10.58
1388	10.02	8.16	8.46	11.348	12.07	8.87	10.69	10.53
1389	10.02	8.16	8.37	11.348	12.35	8.87	10.44	10.58
1390	10.02	8.16	8.8	11.406	12.02	8.87	10.44	10.58
1391	10.02	8.16	8.41	11.348	12.02	8.87	10.69	10.53
1392	9.84	8.16	8.46	11.348	12.36	8.83	10.64	10.58
1393	9.84	8.16	8.71	11.348	12.36	8.88	10.39	10.58
1394	9.87	8.16	8.5	11.348	12.13	8.88	10.39	10.58
1395	9.87	8.16	8.5	11.103	12.13	8.88	10.44	10.58
1396	9.87	8.11	8.46	11.103	12.13	8.88	10.44	10.38
1397	9.87	8.16	8.46	11.103	12.07	8.88	10.44	10.63
1398	9.87	8.16	8.46	11.348	12.02	8.88	10.39	10.74
1399	9.94	8.36	8.25	11.348	12.02	8.92	10.13	10.63
1400	9.94	8.36	8.25	11.348	12.02	8.92	10.19	10.38
1401	9.87	8.36	8.21	11.348	12.07	8.92	10.19	10.74
1402	9.87	8.36	8.21	11.103	12.13	8.92	10.24	10.33
1403	9.87	8.36	8.21	11.348	12.13	8.92	9.98	10.63
1404	9.87	8.36	8.46	11.348	12.13	8.83	9.98	10.38
1405	9.87	8.36	8.42	11.299	11.84	8.83	9.93	10.38
1406	9.87	8.36	8.46	11.299	11.74	8.83	9.93	10.58
1407	9.84	8.36	8.37	11.299	11.74	8.83	9.93	10.58
1408	9.87	8.16	8.7	11.603	11.63	9.13	9.89	10.47
1409	9.84	8.16	8.66	11.544	11.79	9.13	9.93	10.42
1410	9.87	8.16	8.66	11.603	12.07	8.87	9.98	10.28
1411	9.87	8.16	8.66	11.494	11.79	9.12	9.93	10.53
1412	9.84	8.16	8.66	11.494	11.84	9.12	10.19	10.33
1413	9.94	8.16	8.66	11.739	11.84	9.12	10.19	10.28
1414	9.9	8.16	8.66	11.739	11.84	9.12	10.19	10.22
1415	9.87	8.16	8.66	11.739	11.84	9.08	10.13	10.22
1416	9.87	8.16	8.66	11.739	11.84	9.08	10.39	10.28
1417	9.69	8.16	8.66	11.799	11.79	9.08	10.44	10.22
1418	9.69	8.16	8.66	11.739	11.79	8.83	10.44	10.22
1419	9.69	8.16	8.37	11.799	11.63	8.83	10.39	10.22
1420	9.69	8.16	8.61	11.799	11.85	8.83	10.33	10.22
1421	9.83	8.16	8.66	11.739	11.95	9.13	10.33	10.28
1422	9.76	8.16	8.7	11.69	11.95	8.83	10.33	10.33
1423	9.83	8.16	8.66	11.739	11.95	8.87	10.33	10.33
1424	9.83	8.16	8.66	11.69	11.95	9.12	10.39	10.22
1425	9.86	8.16	8.45	11.69	11.9	9.12	10.39	10.53
1426	9.86	8.16	8.46	11.69	11.9	9.12	10.39	10.53
1427	9.86	8.16	8.46	11.749	11.9	9.08	10.39	10.53
1428	9.86	7.92	8.5	11.69	11.62	8.83	10.44	10.53
1429	9.86	8.21	8.46	11.749	11.56	8.83	10.39	10.53
1430	9.86	7.97	8.21	11.749	11.56	9.08	10.39	10.22
1431	9.86	8.21	8.21	11.935	11.56	8.83	10.39	10.22
1432	10.05	8.16	8.17	11.935	11.85	8.83	10.39	10.22
1433	9.86	8.16	8.21	12.057	11.85	8.87	10.44	10.22
1434	9.86	8.16	8.21	11.69	11.9	8.87	10.44	10.22
1435	9.86	8.16	8.21	11.64	11.9	8.87	10.44	10.22
1436	9.86	8.16	8.17	11.64	11.62	8.87	10.13	10.28
1437	10.05	8.16	8.21	11.946	11.9	8.87	10.13	10.22
1438	10.05	8.16	8.21	11.946	11.62	8.87	10.13	10.22
1439	10.05	8.16	8.21	11.885	11.62	8.87	10.13	10.22
1440	9.83	8.16	8.16	11.896	11.85	8.88	10.18	10.22
1441	10.01	8.16	8.41	11.836	11.85	8.88	10.44	10.22
1442	10.01	8.16	8.41	11.836	11.62	8.88	10.13	10.17
1443	10.01	8.16	8.36	11.699	11.62	8.63	10.13	10.22
1444	10.01	8.16	8.36	11.759	11.9	8.88	10.13	9.97
1445	9.97	8.16	8.36	11.64	11.62	8.63	10.39	10.22
1446	9.97	8.11	8.56	11.699	11.62	8.67	10.44	10.02
1447	9.97	8.11	8.56	11.64	11.56	8.92	10.44	10.22
1448	9.97	8.11	8.36	11.64	11.56	8.87	10.39	10.22
1449	10.16	8.11	8.61	11.64	11.56	8.87	10.39	9.97
1450	10.16	8.11	8.66	11.64	11.85	8.87	10.39	10.02
1451	9.97	8.06	8.66	11.444	11.9	8.83	10.39	9.97
1452	10.16	8.31	8.66	11.561	11.62	8.83	10.39	10.17
1453	10.16	8.31	8.66	11.503	11.62	8.83	10.39	10.02
1454	10.16	8.31	8.41	11.561	11.62	8.78	10.44	10.02
1455	10.12	8.31	8.49	11.444	11.62	9.07	10.39	10.02
1456	10.16	8.31	8.49	11.494	11.85	9.07	10.39	10.02
1457	10.16	8.31	8.45	11.494	11.56	8.82	10.39	10.22
1458	10.12	8.31	8.49	11.494	11.56	8.83	10.39	10.22
1459	10.12	8.31	8.45	11.364	11.62	8.83	10.13	10.22
1460	10.16	8.31	8.2	11.249	11.62	8.83	10.44	10.38
1461	10.16	8.31	8.21	11.249	11.62	8.83	10.18	10.28
1462	10.16	8.36	8.21	11.494	11.62	8.87	10.44	10.22
1463	9.97	8.11	8.25	11.249	11.62	8.87	10.44	10.22
1464	10.16	8.11	8.21	11.249	11.62	8.87	10.39	10.22
1465	10.16	8.11	8.25	11.494	11.62	8.62	10.13	10.22
1466	10.16	8.11	8.25	11.249	11.62	8.62	10.13	10.28
1467	10.12	8.11	8.25	11.249	11.56	8.63	10.13	10.33
1468	10.16	8.16	8.29	11.494	11.56	8.63	10.39	10.22
1469	10.12	7.92	8.54	11.494	11.56	8.62	10.44	10.17
1470	10.12	7.92	8.54	11.494	11.56	8.92	10.44	10.28
1471	10.12	7.92	8.21	11.494	11.33	8.92	10.18	10.22
1472	10.12	7.92	8.25	11.494	11.62	8.92	10.13	10.33
1473	10.26	7.97	8.21	11.494	11.33	8.88	10.13	10.33
1474	10.45	7.97	8.45	11.494	11.33	8.88	10.13	10.33
1475	10.45	7.97	8.41	11.494	11.33	8.83	10.13	10.22
1476	10.41	8.21	8.45	11.494	11.56	8.88	10.19	10.22
1477	10.41	8.16	8.41	11.494	11.56	8.87	10.24	10.33
1478	10.41	8.21	8.45	11.444	11.56	8.87	10.24	10.27
1479	10.41	8.16	8.61	11.494	11.38	8.87	10.24	10.33
1480	10.41	8.25	8.65	11.494	11.44	8.87	10.19	10.28
1481	10.41	8.16	8.65	11.494	11.39	8.87	10.19	10.33
1482	10.41	8.21	8.65	11.494	11.39	9.08	10.19	10.22
1483	10.41	8.21	8.61	11.494	11.39	9.08	10.19	10.27
1484	10.41	8.21	8.65	11.494	11.62	8.83	10.24	10.08
1485	10.41	8.21	8.65	11.435	11.34	9.17	10.19	10.02
1486	10.45	8.21	8.65	11.494	11.62	8.87	10.19	10.33
1487	10.45	8.16	8.61	11.249	11.39	8.92	10.19	10.33
1488	10.45	8.25	8.65	11.249	11.67	8.92	10.19	10.22
1489	10.26	7.97	8.6	11.494	11.39	8.88	10.24	10.27
1490	10.26	8.16	8.89	11.494	11.39	8.88	10.24	10.08
1491	10.26	8.25	8.89	11.494	11.39	8.88	9.98	10.02
1492	10.26	8.25	9.05	11.249	11.62	8.88	10.19	10.08
1493	10.3	8.16	9.05	11.494	11.62	8.88	10.19	10.38
1494	10.3	8.21	9.09	11.494	11.28	8.92	10.24	10.27
1495	10.12	8.21	8.85	11.494	11.56	8.92	10.24	10.02
1496	10.3	8.21	8.89	11.494	11.67	8.92	9.93	10.08
1497	10.3	8.21	8.84	11.494	11.67	8.92	10.19	10.27
1498	10.3	8.21	9.09	11.494	11.62	8.88	10.24	10.08
1499	10.12	8.21	9.09	11.494	11.33	8.88	10.24	10.02
1500	10.3	8.16	9.14	11.494	11.62	8.88	9.93	10.02
1501	10.3	8.2	9.14	11.494	11.62	8.88	9.93	10.08
1502	10.3	8.2	9.04	11.494	11.56	8.92	9.93	10.13
1503	10.3	8.45	9.04	11.494	11.56	8.92	9.98	10.02
1504	10.3	8.41	9	11.494	11.56	8.67	9.98	10.08
1505	10.3	8.41	9.09	11.494	11.56	8.67	9.93	10.18
1506	10.3	8.41	8.75	11.494	11.62	8.92	9.93	9.97
1507	10.3	8.41	9.05	11.494	11.62	8.88	9.93	10.13
1508	10.3	8.41	9.05	11.494	11.62	8.88	9.98	10.13
1509	10.48	8.41	8.8	11.494	11.62	8.88	9.68	9.97
1510	10.48	8.41	9	11.494	11.62	8.88	9.98	10.27
1511	10.45	8.41	8.71	11.494	11.67	8.88	9.93	10.08
1512	10.45	8.41	8.75	11.494	11.62	8.67	9.78	10.02
1513	10.45	8.46	8.75	11.494	11.62	8.67	9.78	9.97
1514	10.45	8.41	8.8	11.494	11.62	8.67	9.73	10.13
1515	10.45	8.21	8.8	11.249	11.62	8.92	9.73	10.02
1516	10.63	8.21	8.8	11.494	11.56	8.67	9.73	10.07
1517	10.63	8.21	8.55	11.494	11.85	8.63	9.78	10.08
1518	10.45	8.21	8.55	11.494	11.85	8.63	9.78	10.08
1519	10.63	8.21	8.55	11.494	11.85	8.63	9.78	10.08
1520	10.59	8.21	8.55	11.494	11.9	8.63	9.73	10.08
1521	10.63	8.16	8.55	11.494	11.95	8.67	9.53	10.08
1522	10.45	8.21	8.65	11.494	11.9	8.67	9.62	10.02
1523	10.63	8.21	8.65	11.494	11.9	8.67	9.78	10.13
1524	10.45	8.21	8.65	11.494	11.9	8.67	9.53	10.08
1525	10.45	8.21	8.65	11.494	11.85	8.68	9.58	10.02
1526	10.45	8.21	8.48	11.444	11.85	8.68	9.53	9.97
1527	10.45	8.16	8.69	11.444	12.13	8.63	9.53	10.02
1528	10.45	8.21	8.65	11.444	11.9	8.68	9.37	10.08
1529	10.45	8.16	8.69	11.69	11.9	8.67	9.33	9.97
1530	10.45	8.21	8.44	11.69	11.9	8.67	9.33	10.02
1531	10.45	8.16	8.65	11.69	11.9	8.42	9.38	10.02
1532	10.45	8.41	8.65	11.69	11.85	8.63	9.33	9.97
1533	10.26	8.16	8.65	11.69	11.62	8.63	9.33	9.97
1534	10.26	8.41	8.69	11.69	11.62	8.43	9.38	10.02
1535	10.26	8.16	8.74	11.69	11.62	8.38	9.33	9.97
1536	10.3	8.16	8.74	11.69	11.72	8.67	9.38	9.97
1537	10.12	8.41	8.45	11.69	11.56	8.68	9.33	10.02
1538	10.12	8.41	8.66	11.69	11.56	8.63	9.33	10.02
1539	10.16	8.41	8.41	11.69	11.56	8.68	9.33	9.97
1540	10.16	8.16	8.41	11.69	11.62	8.63	9.38	9.97
1541	10.16	8.16	8.66	11.69	11.62	8.67	9.38	10.02
1542	10.16	8.16	8.66	11.69	11.62	8.68	9.33	9.97
1543	10.16	8.16	8.61	11.69	11.56	8.63	9.33	9.97
1544	9.97	8.16	8.69	11.69	11.85	8.63	9.33	10.02
1545	10.16	8.16	8.74	11.69	11.91	8.67	9.38	9.92
1546	10.12	8.21	8.74	11.69	11.67	8.67	9.33	10.17
1547	10.12	8.21	8.64	11.69	11.67	8.67	9.33	10.22
1548	10.12	8.21	8.95	11.69	11.56	8.63	9.33	10.17
1549	10.3	8.21	8.89	11.64	11.62	8.63	9.33	10.37
1550	10.3	8.21	8.89	11.69	11.62	8.63	9.38	10.37
1551	10.26	8.21	8.64	11.69	11.62	8.67	9.33	10.37
1552	10.26	8.21	8.69	11.69	11.67	8.63	9.33	10.32
1553	10.26	8.21	8.69	11.69	11.67	8.67	9.33	10.37
1554	10.26	8.21	8.69	11.69	11.67	8.63	9.33	10.62
1555	10.26	8.16	8.69	11.444	11.62	8.63	9.38	10.57
1556	10.26	8.21	8.69	11.444	11.91	8.68	9.38	10.37
1557	10.45	8.21	8.69	11.494	12.01	8.63	9.33	10.37
1558	10.45	8.21	8.74	11.494	12.01	8.63	9.33	10.32
1559	10.45	8.21	8.74	11.494	11.96	8.67	9.18	10.37
1560	10.45	8.21	8.69	11.494	11.96	8.72	9.18	10.42
1561	10.45	8.21	8.74	11.494	11.91	8.72	9.18	10.12
1562	10.45	8.21	8.74	11.494	11.91	8.68	9.13	10.12
1563	10.45	8.21	8.74	11.249	11.85	8.68	9.13	10.17
1564	10.3	8.21	8.74	11.494	11.67	8.68	9.38	10.07
1565	10.3	8.21	8.69	11.494	11.9	8.63	9.13	10.42
1566	10.3	8.21	8.69	11.249	11.9	8.68	9.18	10.42
1567	10.3	7.97	8.61	11.494	11.85	8.43	9.13	10.12
1568	10.3	8.21	8.69	11.494	11.74	8.72	9.13	10.17
1569	10.3	8.21	8.69	11.249	11.8	8.72	9.13	10.12
1570	10.3	8.21	8.69	11.494	11.85	8.72	9.13	10.12
1571	10.3	8.21	8.69	11.494	11.9	8.68	9.13	10.17
1572	10.48	8.21	8.74	11.544	11.84	8.43	9.13	10.07
1573	10.26	8.21	8.74	11.299	11.84	8.68	9.13	10.12
1574	10.26	8.21	8.74	11.299	12.13	8.68	9.13	10.17
1575	10.26	8.21	8.69	11.299	12.07	8.72	9.18	10.12
1576	10.45	8.21	8.74	11.299	12.02	8.72	9.13	10.12
1577	10.45	8.21	8.49	11.299	12.02	8.68	9.13	10.17
1578	10.45	8.21	8.49	11.299	12.02	8.43	9.13	10.12
1579	10.45	8.21	8.79	11.299	12.07	8.63	9.13	10.12
1580	10.45	8.21	8.53	11.249	12.13	8.68	9.18	10.12
1581	10.59	8.21	8.79	11.299	12.13	8.67	9.18	10.12
1582	10.41	8.21	8.79	11.299	12.13	8.67	9.18	10.12
1583	10.41	8.21	8.49	11.299	11.84	8.42	9.18	10.37
1584	10.41	8.21	8.49	11.299	11.74	8.38	8.97	10.12
1585	10.45	8.21	8.41	11.299	11.79	8.63	9.23	10.17
1586	10.45	7.97	8.49	11.299	11.69	8.63	8.93	10.12
1587	10.45	8.21	8.44	11.299	11.8	8.43	8.93	10.12
1588	10.45	8.21	8.49	11.299	11.85	8.47	8.93	10.17
1589	10.45	8.21	8.49	11.299	11.85	8.72	8.93	10.17
1590	10.45	8.16	8.74	11.299	11.9	8.68	8.97	10.12
1591	10.26	8.16	8.74	11.299	12.19	8.68	8.97	10.12
1592	10.26	8.16	8.79	11.299	11.9	8.63	8.97	10.17
1593	10.26	8.41	8.74	11.299	12.13	8.63	8.93	10.17
1594	10.45	8.41	8.69	11.299	11.85	8.67	8.93	10.17
1595	10.45	8.41	8.74	11.299	12.13	8.67	9.23	10.22
1596	10.45	8.36	8.74	11.299	12.13	8.63	9.23	10.22
1597	10.45	8.36	8.74	11.053	12.24	8.63	9.23	9.92
1598	10.45	8.4	8.74	11.299	12.19	8.63	9.18	10.17
1599	10.45	8.74	8.74	11.299	12.19	8.63	9.23	9.97
1600	10.45	8.49	8.69	11.299	12.19	8.67	9.06	10.17
1601	10.45	8.6	8.69	11.299	12.19	8.67	9.32	9.92
1602	10.26	8.6	8.69	11.299	12.19	8.67	9.27	9.97
1603	10.26	8.36	8.74	11.299	12.13	8.67	9.13	9.97
1604	10.26	8.36	8.74	11.299	12.07	8.68	8.88	9.92
1605	10.26	8.45	8.99	11.299	12.07	8.63	9.22	9.92
1606	10.26	8.16	8.94	11.299	12.13	8.63	8.97	9.97
1607	10.26	8.21	8.94	11.299	12.07	8.63	8.88	9.97
1608	10.23	8.21	8.89	11.299	12.13	8.63	8.88	9.92
1609	10.23	8.34	8.89	11.348	12.13	8.63	9.22	9.97
1610	10.23	8.21	8.89	11.348	12.13	8.63	9.27	9.72
1611	10.41	8.21	8.89	11.348	12.19	8.59	9.31	9.68
1612	10.41	8.21	8.89	11.348	12.19	8.83	9.18	9.92
1613	10.37	8.3	8.95	11.348	12.13	8.83	9.27	9.97
1614	10.37	8.45	8.95	11.348	12.13	8.88	9.18	9.97
1615	10.37	8.5	8.99	11.348	12.13	8.92	9.32	9.92
1616	10.37	8.41	8.89	11.348	12.13	8.67	9.32	9.97
1617	10.37	8.45	8.99	11.348	12.19	8.83	9.36	9.97
1618	10.56	8.49	8.94	11.348	12.19	8.83	9.13	9.92
1619	10.52	8.41	8.95	11.348	12.19	8.83	9.23	9.92
1620	10.56	8.54	8.89	11.348	12.13	8.88	9.27	9.97
1621	10.56	8.45	8.89	11.348	12.13	8.68	9.27	9.97
1622	10.56	8.54	8.89	11.348	12.13	8.68	9.27	9.92
1623	10.37	8.54	9.15	11.103	12.13	8.67	9.18	9.92
1624	10.56	8.45	9.15	11.103	12.19	8.72	9.38	9.97
1625	10.56	8.41	9.15	11.103	12.19	8.72	9.18	9.87
1626	10.37	8.45	9.15	11.103	12.19	8.63	9.43	9.92
1627	10.37	8.49	9.15	11.103	12.13	8.68	9.52	10.17
1628	10.37	8.7	9.15	11.103	12.13	8.88	9.52	10.12
1629	10.37	8.45	9.1	11.103	12.13	8.88	9.43	10.12
1630	10.19	8.54	9.15	11.348	12.47	8.63	9.38	10.17
1631	10.23	8.41	9.15	11.103	12.47	8.92	9.38	10.37
1632	10.23	8.45	9.15	11.103	12.47	8.67	9.52	10.37
1633	10.04	8.41	8.89	11.103	12.47	8.63	9.43	10.37
1634	10.04	8.45	8.89	11.103	12.36	8.68	9.57	10.42
1635	10.04	8.25	8.94	11.103	12.42	8.68	9.42	10.27
1636	10.08	8.25	8.94	11.348	12.42	8.68	9.33	10.37
1637	10.08	8.3	8.89	11.348	12.13	8.72	9.38	10.37
1638	10.08	8.3	8.95	11.103	12.19	8.68	9.52	10.12
1639	9.9	8.16	8.9	11.153	12.19	8.68	9.43	10.12
1640	9.9	8.21	8.95	11.153	12.19	8.68	9.52	10.12
1641	9.94	8.16	8.69	11.153	12.19	8.63	9.52	10.07
1642	9.94	8.25	8.95	11.153	12.13	8.72	9.43	10.12
1643	9.94	8.21	8.65	11.153	12.08	8.72	9.38	10.12
1644	9.94	8.25	8.65	11.153	12.13	8.68	9.38	10.02
1645	9.94	8.25	8.65	11.398	11.85	8.43	9.52	10.27
1646	9.94	8.3	8.65	11.153	12.13	8.43	9.52	10.37
1647	9.75	8.25	8.69	11.153	11.9	8.47	9.48	10.27
1648	9.94	8.46	8.65	11.103	12.19	8.47	9.38	10.27
1649	9.94	8.49	8.61	11.153	12.19	8.68	9.43	10.27
1650	9.94	8.46	8.56	11.153	12.19	8.43	9.43	10.57
1651	9.94	8.21	8.61	11.153	12.13	8.68	9.52	10.57
1652	9.94	8.46	8.69	11.153	12.13	8.43	9.52	10.52
1653	10.08	8.21	8.69	11.153	11.85	8.72	9.43	10.27
1654	10.08	8.21	8.69	11.153	11.91	8.47	9.52	10.27
1655	10.08	8.21	8.74	11.153	11.91	8.47	9.43	10.37
1656	10.08	8.21	8.49	11.153	12.24	8.43	9.52	10.27
1657	10.26	8.21	8.49	11.153	12.24	8.43	9.52	10.27
1658	10.23	8.21	8.53	11.153	11.96	8.43	9.52	10.32
1659	10.26	8.21	8.49	10.908	11.96	8.43	9.43	10.07
1660	10.26	8.24	8.53	10.908	12.19	8.43	9.38	10.07
1661	10.26	8.49	8.79	10.908	12.19	8.43	9.43	10.07
1662	10.26	8.45	8.7	11.153	12.19	8.59	9.43	10.12
1663	10.26	8.45	8.74	11.153	12.13	8.39	9.52	10.07
1664	10.26	8.24	8.74	11.153	12.19	8.59	9.43	10.12
1665	10.08	8.16	8.49	11.153	11.91	8.35	9.38	10.42
1666	10.08	8.2	8.49	11.153	12.13	8.35	9.38	10.42
1667	10.08	8.41	8.49	11.153	12.24	8.59	9.43	10.37
1668	10.08	8.5	8.49	10.908	12.24	8.54	9.43	10.37
1669	10.04	8.41	8.49	10.908	12.24	8.64	9.43	10.17
1670	10.23	8.21	8.49	10.908	12.24	8.68	9.43	10.37
1671	10.23	8.21	8.49	11.153	12.24	8.63	9.68	10.37
1672	10.23	8.25	8.49	10.908	12.19	8.59	9.58	10.42
1673	10.08	8.3	8.49	11.153	12.19	8.63	9.64	10.12
1674	10.08	8.21	8.53	10.908	11.91	8.59	9.78	10.07
1675	10.08	8.21	8.79	10.908	11.91	8.59	9.78	10.12
1676	9.9	8.21	8.79	10.957	12.24	8.59	9.78	10.12
1677	9.9	8.21	8.79	10.957	12.24	8.54	9.78	10.07
1678	9.94	8.21	8.79	10.957	12.24	8.59	9.68	10.12
1679	9.94	8.21	8.79	10.957	12.24	8.63	9.38	10.12
1680	9.94	8.21	8.69	10.957	12.19	8.63	9.52	10.12
1681	9.94	8.21	8.79	10.957	12.19	8.34	9.52	10.13
1682	9.94	8.21	8.74	10.957	12.19	8.39	9.57	10.15
1683	9.94	8.21	8.74	11.203	12.24	8.43	9.57	10.24
1684	9.94	8.21	8.49	11.203	12.24	8.34	9.52	10.11
1685	9.94	7.97	8.74	11.203	12.24	8.43	9.38	10.11
1686	9.94	8.21	8.74	11.203	11.91	8.64	9.38	10.11
1687	9.94	8.21	8.49	11.153	12.24	8.39	9.43	10.11
1688	9.94	8.21	8.49	11.153	12.3	8.59	9.48	10.04
1689	9.94	8.21	8.7	11.203	12.35	8.34	9.52	10.05
1690	9.94	8.21	8.49	11.203	12.35	8.64	9.48	10.04
1691	9.94	8.21	8.49	11.203	12.24	8.43	9.43	10
1692	9.75	8.21	8.49	11.203	11.91	8.72	9.43	10
1693	9.97	8.21	8.45	11.153	11.91	8.72	9.43	9.85
1694	9.92	8.21	8.46	11.153	12.01	8.72	9.45	9.93
1695	9.92	8.21	8.25	11.203	12.01	8.42	9.47	9.44
1696	9.92	8.21	8.29	11.203	11.96	8.38	9.44	9.82
1697	9.92	7.97	8.25	11.203	11.96	8.63	9.44	9.95
1698	9.74	7.97	8.54	11.203	11.91	8.63	9.44	9.9
1699	9.74	8.21	8.54	11.203	11.67	8.68	9.44	9.91
1700	9.74	7.97	8.5	11.203	11.73	8.68	9.41	9.91
1701	9.78	8.21	8.24	11.203	12.06	8.43	9.41	9.91
1702	9.96	7.97	8.49	11.203	11.96	8.43	9.4	9.92
1703	9.92	8.21	8.49	11.203	11.62	8.72	9.39	9.91
1704	9.79	8.21	8.49	11.203	11.85	8.72	9.39	9.79
1705	9.92	8.21	8.49	11.203	11.9	8.47	9.39	9.83
1706	10.11	8.21	8.49	11.203	12.01	8.43	9.39	9.85
1707	10.04	8.21	8.49	11.203	12.01	8.39	9.39	9.77
1708	10.04	8.21	8.49	11.203	11.9	8.43	9.41	9.76
1709	10.11	8.21	8.53	11.203	11.9	8.43	9.41	9.74
1710	10.11	8.21	8.53	11.203	11.85	8.43	9.4	9.7
1711	10.11	8.21	8.79	11.203	11.95	8.43	9.4	9.71
1712	10.11	8.21	8.74	11.203	11.95	8.47	9.4	9.69
1713	10.11	7.97	8.74	11.203	12.01	8.47	9.4	9.69
1714	10.11	8.21	8.65	10.957	12.24	8.39	9.39	9.68
1715	10.11	7.97	8.69	11.203	12.24	8.43	9.38	9.67
1716	10.04	7.97	8.69	10.957	12.19	8.43	9.35	9.64
1717	10.11	7.97	8.65	11.203	12.19	8.43	9.35	9.65
1718	10.11	7.92	8.66	11.203	12.24	8.43	9.33	9.64
1719	10.11	8.21	8.66	11.203	12.3	8.47	9.35	9.65
1720	10.29	8.21	8.66	11.203	12.35	8.42	9.32	9.65
1721	10.29	8.21	8.7	10.957	12.24	8.43	9.32	9.64
1722	10.23	8.21	8.61	10.957	11.96	8.43	9.29	9.63
1723	10.29	8.21	8.69	10.957	11.91	8.43	9.3	9.61
1724	10.16	8.21	8.65	11.203	12.19	8.47	9.29	9.61
1725	10.11	8.16	8.65	11.203	12.19	8.47	9.31	9.57
1726	10.29	8.21	8.69	10.957	12.24	8.47	9.3	9.59
1727	10.29	8.16	8.69	10.957	12.24	8.43	9.3	9.58
1728	10.11	8.21	8.69	10.957	12.35	8.63	9.31	9.59
1729	10.04	8.21	8.69	10.957	12.24	8.63	9.3	9.57
1730	10.04	8.21	8.9	10.957	12.24	8.67	9.3	9.55
1731	10.29	8.21	8.9	10.957	12.24	8.67	9.31	9.55
1732	10.11	8.41	8.9	10.957	12.19	8.67	9.29	9.56
1733	10.15	8.46	8.65	10.957	12.19	8.38	9.28	9.55
1734	10.08	8.46	8.65	10.957	12.24	8.63	9.29	9.5
1735	10.01	8.21	8.69	10.957	12.24	8.38	9.28	9.53
1736	10.15	8.46	8.69	10.712	12.24	8.67	9.27	9.51
1737	10.11	8.46	8.69	10.712	12.23	8.67	9.26	9.54
1738	10.11	8.41	8.69	10.957	12.23	8.67	9.26	9.54
1739	10.11	8.46	8.65	10.957	12.24	8.68	9.26	9.54
1740	10.11	8.41	8.69	10.767	12.24	8.63	9.25	9.54
1741	10.29	8.46	8.69	11.013	12.23	8.72	9.25	9.54
1742	10.11	8.21	8.69	10.712	12.24	8.72	9.24	9.54
1743	10.11	8.21	8.69	10.957	12.24	8.72	9.2	9.56
1744	10.11	8.21	8.69	11.013	12.23	8.72	9.2	9.54
1745	10.29	8.21	8.65	10.957	12.22	8.67	9.17	9.55
1746	10.29	8.21	8.74	10.712	12.24	8.63	9.16	9.54
1747	10.29	8.21	8.74	10.712	12.23	8.43	9.18	9.48
1748	10.11	8.21	8.69	10.712	12.22	8.72	9.16	9.5
1749	10.29	8.21	8.7	10.767	12.22	8.72	9.14	9.48
1750	9.97	8.21	8.65	10.712	12.23	8.72	9.13	9.48
1751	10.16	8.21	8.61	10.712	12.23	8.67	9.13	9.46
1752	10.16	7.97	8.86	10.767	12.23	8.47	9.11	9.45
1753	10.16	8.21	8.86	10.712	12.59	8.72	9.08	9.44
1754	9.97	8.21	8.86	10.712	12.67	8.72	9.08	9.43
1755	10.16	8.21	8.81	10.762	12.15	8.68	9.08	9.4
1756	9.97	8.21	8.9	10.762	12.44	8.68	9.08	9.38
1757	10.12	8.21	8.61	10.817	12.49	8.43	9.08	9.37
1758	10.16	8.21	8.86	10.817	12.53	8.43	9.08	9.33
1759	10.12	8.16	8.9	10.816	12.55	8.47	9.08	9.27
1760	10.12	8.16	8.86	10.815	12.24	8.47	9.2	9.31
1761	10.12	8.16	8.86	10.8	12.22	8.67	9.24	9.3
1762	10.12	8.16	8.8	10.8	12.12	8.72	9.1	9.31
1763	10.16	8.16	8.8	10.8	12.12	8.47	9.1	9.29
1764	10.16	8.41	8.76	10.8	12.1	8.34	9.02	9.3
1765	10.16	8.16	8.76	10.8	12.1	8.68	9.17	9.33
1766	10.16	8.41	8.76	10.74	12.64	8.68	9.17	9.31
1767	10.16	8.16	8.8	10.745	12.55	8.68	9.25	9.3
1768	9.97	8.16	8.86	10.77	12.43	8.68	9.03	9.26
1769	9.97	8.46	8.86	10.73	12.26	8.68	9.09	9.28
1770	9.97	8.21	8.9	10.77	12.25	8.68	9.04	9.3
1771	9.97	8.21	8.61	10.77	12.27	8.68	9.04	9.27
1772	9.97	8.21	8.86	10.77	12.26	8.68	9.04	9.29
1773	9.97	8.21	8.61	10.77	12.28	8.68	9.04	9.29
1774	9.97	8.21	8.81	10.74	12.27	8.68	9.04	9.22
1775	9.97	8.21	8.81	10.74	11.96	8.68	9.04	9.25
1776	9.97	8.21	8.56	10.76	11.99	8.68	9.09	9.21
1777	10.01	8.21	8.81	10.74	12.07	8.68	9.05	9.21
1778	10.01	8.21	8.81	10.7	12.01	8.68	9.05	9.17
1779	10.01	8.21	8.86	10.66	12.28	8.68	9.02	9.19
1780	9.83	8.21	8.61	10.71	12.05	8.67	8.99	9.18
1781	9.83	8.21	8.61	10.71	11.97	8.67	8.91	9.18
1782	9.89	8.21	8.86	10.7	11.96	8.67	8.92	9.16
1783	9.83	8.21	8.86	10.71	11.97	8.67	8.91	9.15
1784	9.83	8.16	8.61	10.69	11.9	8.67	8.9	9.12
1785	9.89	8.21	8.61	10.7	11.91	8.67	8.92	9.25
1786	9.83	7.92	8.56	10.84	11.83	8.66	8.92	9.12
1787	9.83	8.16	8.56	10.7	11.79	8.66	8.92	9.14
1788	9.64	8.16	8.56	10.71	11.86	8.66	8.87	9.1
1789	9.71	8.16	8.31	10.73	11.92	8.66	8.89	9.08
1790	9.68	8.21	8.61	10.71	11.91	8.66	8.88	9.08
1791	9.68	8.21	8.41	10.7	11.92	8.66	8.88	9.07
1792	9.68	8.21	8.41	10.66	11.92	8.66	8.88	9.07
1793	9.68	8.21	8.41	10.65	11.17	8.66	8.89	9.07
1794	9.68	8.21	8.66	10.67	11.1	8.66	8.89	9.07
1795	9.68	8.21	8.61	10.67	11.1	8.65	8.88	9.05
1796	9.68	7.92	8.61	10.66	11.05	8.65	8.73	9.1
1797	9.68	7.92	8.37	10.54	11.09	8.65	8.71	9.05
1798	9.68	7.97	8.37	10.6	10.93	8.65	8.8	9.08
1799	9.68	7.97	8.41	10.61	10.91	8.65	8.79	9.06
1800	9.68	7.97	8.41	10.6	10.91	8.65	8.77	9.06

## Sheet: EPOC (VO2 beginning)
Tempo (s)	MI 1	MI 2	MI 3	MI 4	HI 1	HI 2	HI 3	HI 4			VO2 - beginning of recovery
1	15.91	12.73	12.47	11.868	21.52	15.11	17	18.29			MI1	MI2	MI3	MI4
2	15.91	12.49	12.16	11.929	21.42	14.86	16.75	18.38			15.6873	12.482	12.455	11.9618
3	15.91	12.49	12.47	11.929	21.42	14.86	16.8	18.29			HI1	HI2	HI3	HI4
4	15.91	12.61	12.47	12.112	21.58	14.83	16.55	18.38			21.094	14.5573	16.2363	18.429
5	15.91	12.73	12.47	12.174	21.32	14.83	16.64	18.52
6	15.91	12.67	12.47	11.929	21.01	14.58	16.6	18.33
7	15.91	12.55	12.47	11.868	21.22	14.63	16.6	18.33
8	15.91	12.55	12.53	11.868	21.22	14.63	16.35	18.33
9	15.91	12.42	12.53	11.818	21.06	14.7	16.4	18.33
10	15.94	12.73	12.53	12.05	21.06	14.7	16.4	18.43
11	15.76	12.73	12.53	11.818	21.37	14.63	16.23	18.33
12	15.76	12.62	12.53	11.868	20.81	14.63	16.4	18.33
13	15.76	12.67	12.47	11.818	20.81	14.38	16.4	18.33
14	15.58	12.67	12.47	11.868	20.91	14.38	16.15	18.33
15	15.62	12.62	12.47	11.929	21.02	14.5	16.2	18.43
16	15.62	12.67	12.47	11.929	21.02	14.76	16.2	18.38
17	15.62	12.67	12.47	11.929	21.02	14.68	16.2	18.57
18	15.62	12.42	12.47	12.174	21.02	14.63	16.28	18.67
19	15.62	12.42	12.53	12.112	20.81	14.63	16.03	18.57
20	15.47	12.42	12.53	11.929	20.81	14.43	15.95	18.67
21	15.47	12.42	12.53	11.868	21.02	14.43	15.95	18.67
22	15.47	12.42	12.53	11.929	20.91	14.43	15.95	18.32
23	15.47	12.42	12.58	11.879	20.81	14.5	16.2	18.42
24	15.65	12.18	12.58	11.868	20.81	14.5	16.2	18.67
25	15.65	12.18	12.33	12.174	21.02	14.5	15.92	18.57
26	15.47	12.18	12.33	12.112	21.27	14.11	15.84	18.42
27	15.47	12.24	12.33	11.818	21.06	14.04	15.75	18.42
28	15.47	12.18	12.27	12.063	21.06	14.04	15.8	18.32
29	15.47	12.18	12.33	12.174	21.27	14.43	15.8	18.42
30	15.47	12.18	12.33	12.05	21.16	14.36	15.55	18.42
